# Supplementary material for: Production and Characterization of Hydrothermal Extracts of the Needles from Four Conifer Tree Species: Scots Pine, Norway Spruce, Common Juniper, and European Larch
Source: PubMed Central journal article supplement (PMC9891111; doi:10.1021/acssuschemeng.2c06406), 2023-01-18
Supplement: sc2c06406_si_001.pdf [file sc2c06406_si_001.pdf]

## *Supporting Information*

# **Production and Characterization of Hydrothermal Extracts of the Needles from Four Conifer Tree Species: Scots Pine, Norway Spruce, Common Juniper, and European Larch**

*Omolara O. Mofikoya, Eemeli Eronen, Marko Mäkinen, and Janne Jänis\**

*University of Eastern Finland, Department of Chemistry, P.O. Box 111, FI-80101 Joensuu, Finland*

*\*Corresponding author: Email: [janne.janis@uef.fi](mailto:janne.janis@uef.fi), Tel. +358-50-4601057*

**Number of Pages: 20**

**Number of Figures: 3**

**Number of Tables: 2**

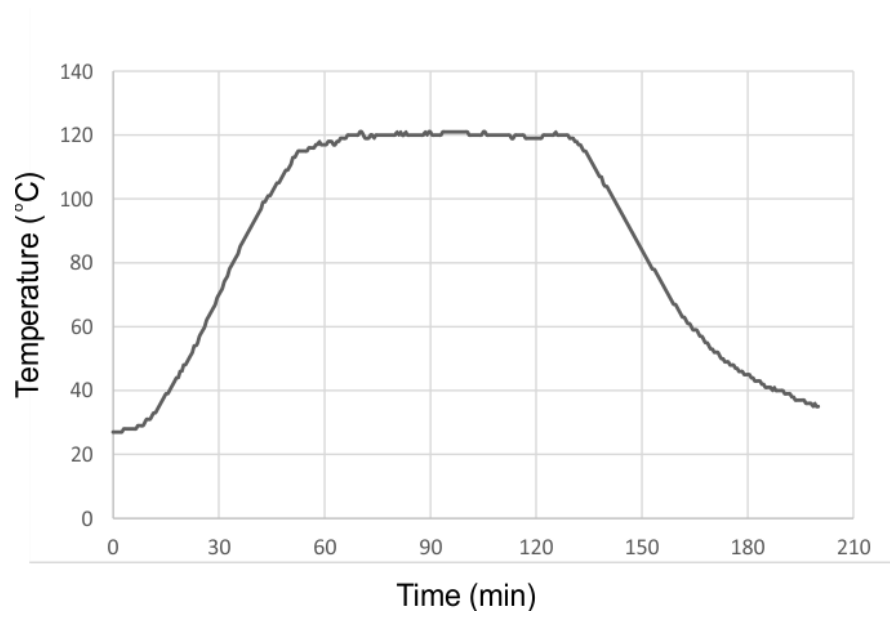

**Figure S1.** Temperature profile for the hydrothermal extraction.

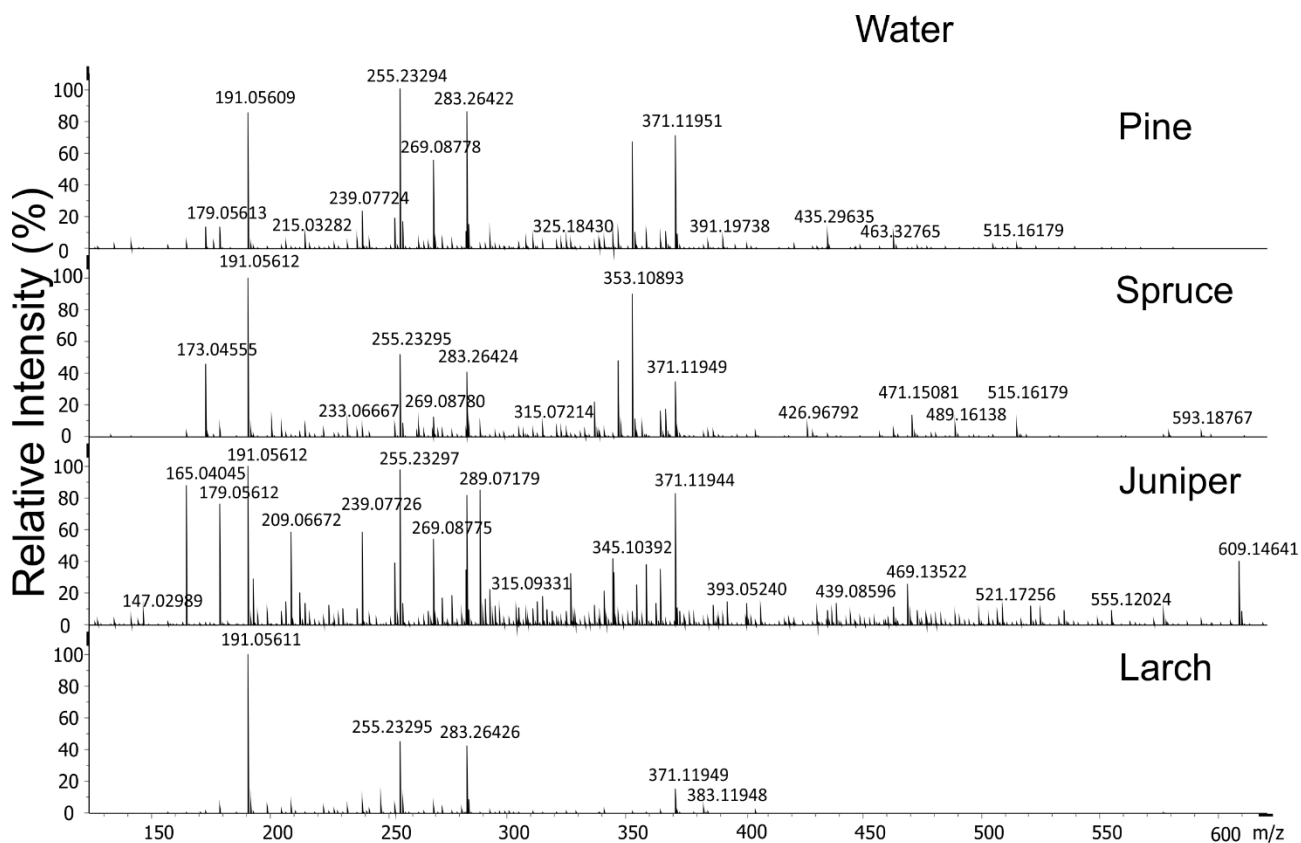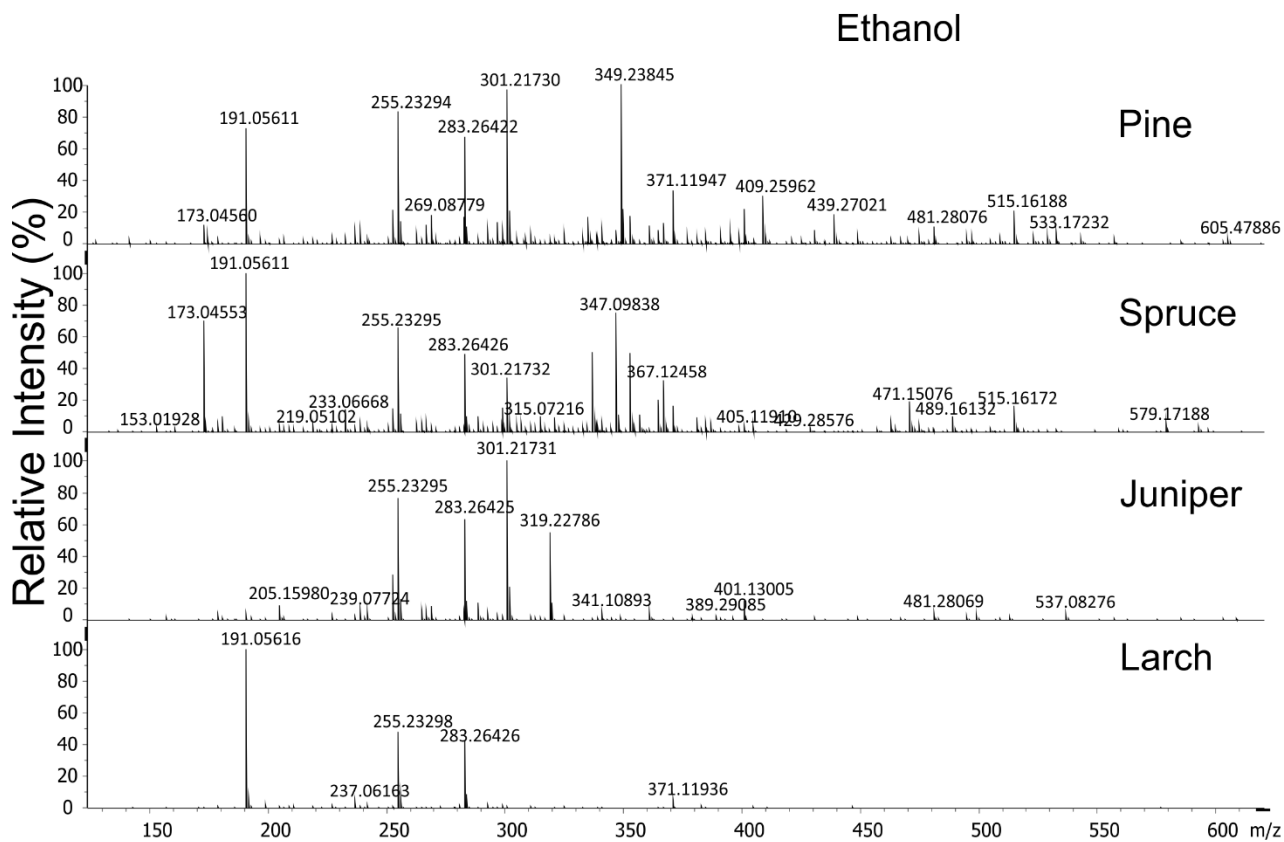

**Figure S2.** (–) ESI mass spectra of the extracts.

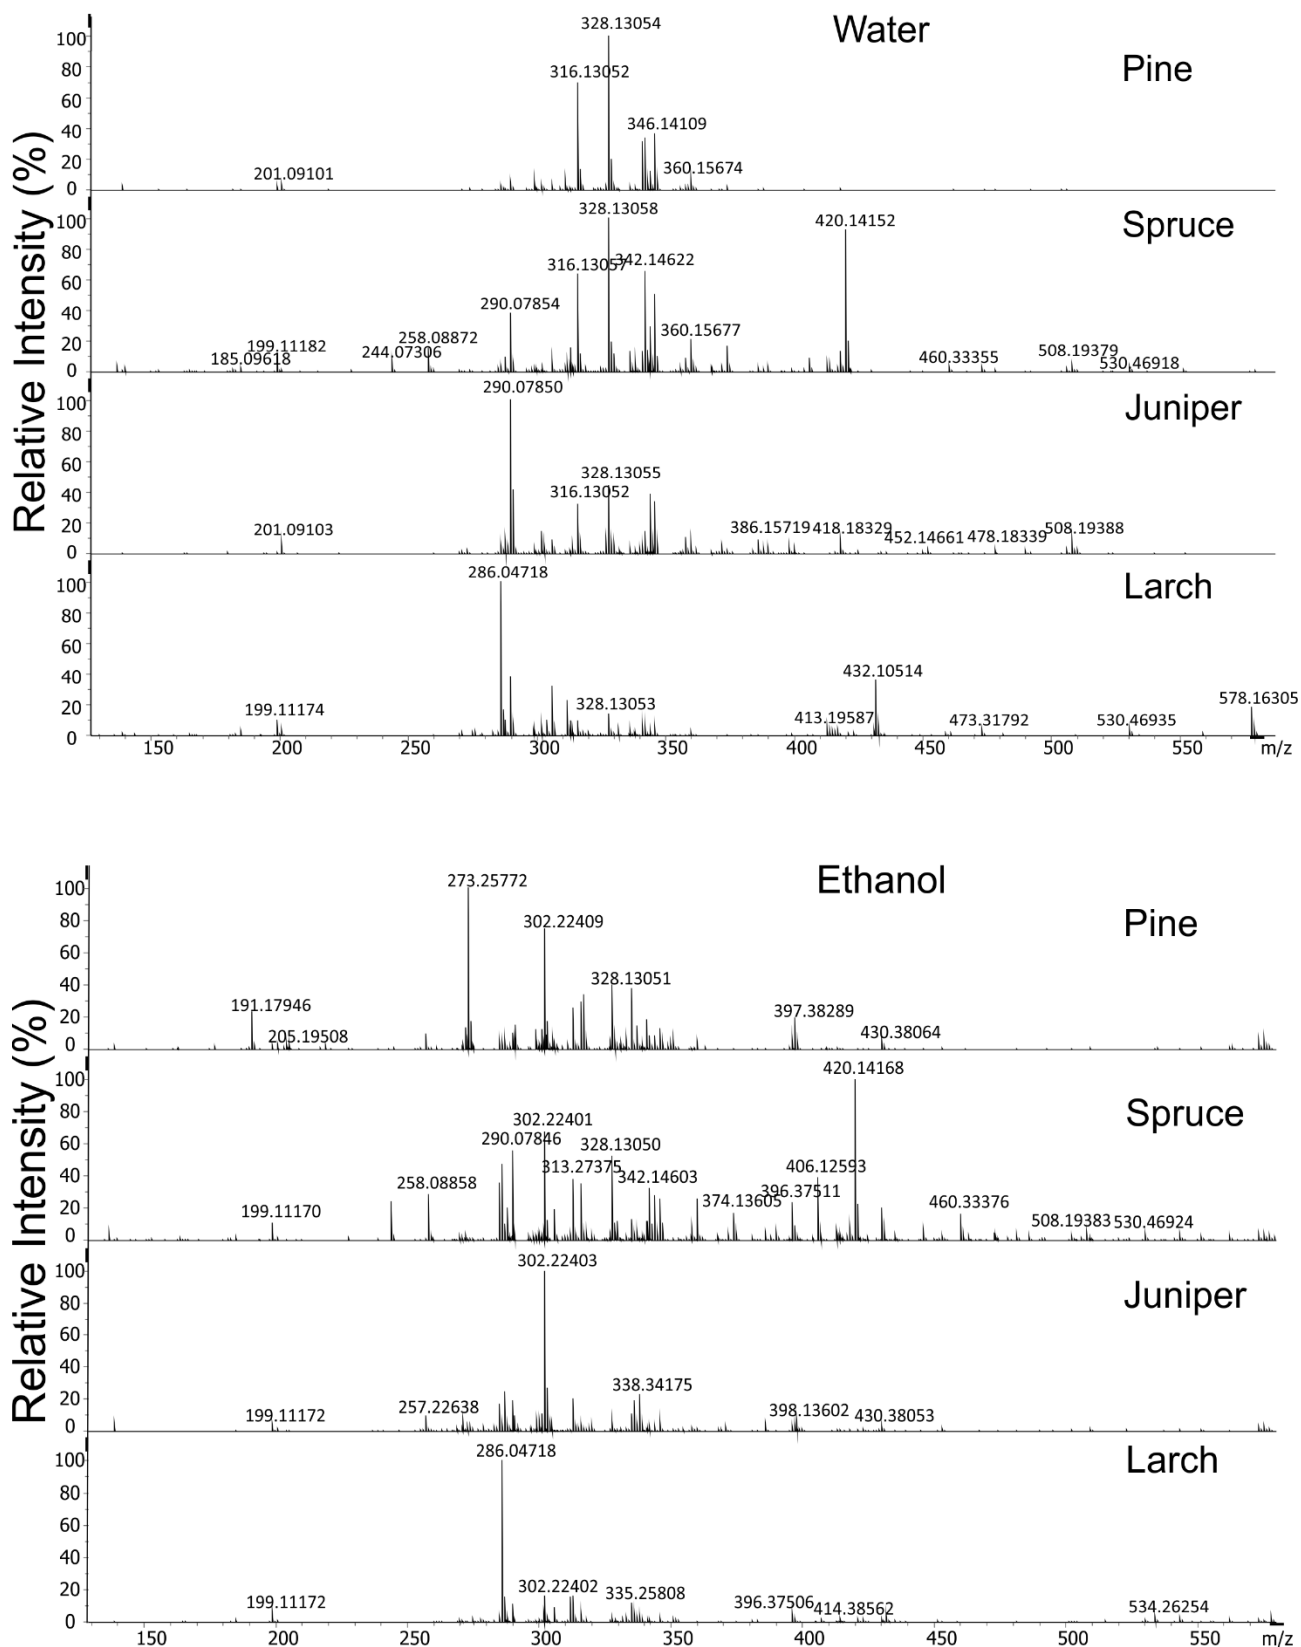

**Figure S3.** (+) APPI mass spectra of the extracts.

**Table S1.** Compounds identified with (–) ESI from the conifer extracts.

| Calculated<br><i>m/z</i> | Observed<br><i>m/z</i> | Elemental<br>formula                           | Error<br>(ppm) | Relative Intensity (%) |               |                |              |             |               |                |              | Tentative compound(s)         | Class         |
|--------------------------|------------------------|------------------------------------------------|----------------|------------------------|---------------|----------------|--------------|-------------|---------------|----------------|--------------|-------------------------------|---------------|
|                          |                        |                                                |                | Water                  |               |                |              | Ethanol     |               |                |              |                               |               |
|                          |                        |                                                |                | <i>Pine</i>            | <i>Spruce</i> | <i>Juniper</i> | <i>Larch</i> | <i>Pine</i> | <i>Spruce</i> | <i>Juniper</i> | <i>Larch</i> |                               |               |
| 105.019332               | 105.019330             | C <sub>3</sub> H <sub>6</sub> O <sub>4</sub>   | 0.023          | N.A                    | 0.0038        | 0.0056         | N.A          | 0.0027      | 0.0132        | N.A            | N.A          | Glyceric acid                 | Organic acid  |
| 115.003682               | 115.003691             | C <sub>4</sub> H <sub>4</sub> O <sub>4</sub>   | -0.073         | N.A                    | 0.0065        | 0.0020         | N.A          | 0.0041      | 0.0172        | 0.0077         | N.A          | Fumaric acid                  | Organic acid  |
| 117.019332               | 117.019335             | C <sub>4</sub> H <sub>6</sub> O <sub>4</sub>   | -0.023         | 0.0140                 | 0.0543        | 0.0208         | 0.0117       | 0.0226      | 0.0752        | 0.0243         | 0.0097       | Succinic acid                 | Organic acid  |
| 121.029503               | 121.029509             | C <sub>7</sub> H <sub>6</sub> O <sub>2</sub>   | -0.051         | 0.0122                 | 0.0322        | 0.0089         | 0.0283       | 0.0176      | 0.0718        | 0.0246         | 0.0189       | Benzoic acid                  | Organic acid  |
| 125.024418               | 125.024430             | C <sub>6</sub> H <sub>6</sub> O <sub>3</sub>   | -0.096         | 0.0087                 | 0.0050        | 0.0073         | N.A          | 0.0096      | 0.0117        | 0.0081         | N.A          | Pyrogallol                    | Monophenol    |
| 133.014247               | 133.014247             | C <sub>4</sub> H <sub>6</sub> O <sub>5</sub>   | -0.001         | 0.0315                 | 0.2960        | 0.0740         | 0.0645       | 0.0417      | 0.1249        | 0.0162         | 0.0485       | Malic acid                    | Organic acid  |
| 135.029897               | 135.029906             | C <sub>4</sub> H <sub>8</sub> O <sub>5</sub>   | -0.063         | 0.0909                 | 0.0597        | 0.1716         | 0.0146       | 0.0289      | 0.0394        | 0.0223         | 0.0158       | Threonic acid                 | Organic acid  |
| 135.045153               | 135.045170             | C <sub>8</sub> H <sub>8</sub> O <sub>2</sub>   | -0.126         | N.A                    | 0.0692        | 0.0044         | N.A          | 0.0065      | 0.0958        | 0.0055         | N.A          | Piceol                        | Monophenol    |
| 137.024418               | 137.024413             | C <sub>7</sub> H <sub>6</sub> O <sub>3</sub>   | 0.033          | 0.0392                 | 0.0736        | 0.0653         | 0.0229       | 0.0509      | 0.2464        | 0.0691         | N.A          | Salicyclic acid               | Organic acid  |
| 147.045153               | 147.045141             | C <sub>9</sub> H <sub>8</sub> O <sub>2</sub>   | 0.081          | N.A                    | 0.0045        | 0.0056         | N.A          | N.A         | 0.0127        | N.A            | N.A          | Cinnamic acid                 | Organic acid  |
| 149.045547               | 149.045550             | C <sub>5</sub> H <sub>10</sub> O <sub>5</sub>  | -0.018         | 0.0696                 | 0.0293        | 0.0871         | 0.0570       | 0.0112      | 0.0191        | 0.0187         | 0.0108       | Xylose                        | Carbohydrate  |
| 151.040068               | 151.040052             | C <sub>8</sub> H <sub>8</sub> O <sub>3</sub>   | 0.107          | 0.0199                 | 0.0314        | 0.0296         | 0.0142       | 0.0181      | 0.0626        | 0.0347         | 0.0143       | Vanillin                      | Organic acid  |
| 151.061197               | 151.061179             | C <sub>5</sub> H <sub>12</sub> O <sub>5</sub>  | 0.122          | 0.0163                 | 0.0081        | 0.0179         | 0.0667       | 0.0147      | 0.0151        | 0.0325         | 0.0319       | Arabitol, Ribitol             | Carbohydrate  |
| 153.019332               | 153.019316             | C <sub>7</sub> H <sub>6</sub> O <sub>4</sub>   | 0.108          | 0.0918                 | 0.0537        | 0.0923         | 0.0419       | 0.1985      | 0.6227        | 0.1711         | 0.0608       | Protocatechuic acid           | Phenolic acid |
| 161.045547               | 161.045537             | C <sub>6</sub> H <sub>10</sub> O <sub>5</sub>  | 0.062          | 0.1086                 | 0.0506        | 0.0717         | 0.0948       | 0.1593      | 0.4159        | 0.2941         | 0.1116       | Levoglucosan                  | Carbohydrate  |
| 163.040068               | 163.040037             | C <sub>9</sub> H <sub>8</sub> O <sub>3</sub>   | 0.190          | 0.0402                 | 0.0559        | 0.0206         | 0.0330       | 0.0231      | 0.1010        | 0.0196         | 0.0115       | p-Coumaric acid               | Phenolic acid |
| 163.061197               | 163.061175             | C <sub>6</sub> H <sub>12</sub> O <sub>5</sub>  | 0.136          | 0.0260                 | 0.0067        | 0.0184         | 0.0241       | 0.0057      | 0.0112        | 0.0129         | N.A          | Rhamnose                      | Carbohydrate  |
| 165.040462               | 165.040436             | C <sub>5</sub> H <sub>10</sub> O <sub>6</sub>  | 0.156          | 1.1636                 | 0.6665        | 10.3203        | 0.3194       | 0.0448      | 0.0806        | 0.0578         | 0.0709       | Ribonic acid, Xylonic acid    | Carbohydrate  |
| 165.055718               | 165.055686             | C <sub>9</sub> H <sub>10</sub> O <sub>3</sub>  | 0.191          | 0.0106                 | 0.0082        | 0.0145         | 0.0221       | 0.0097      | 0.0323        | 0.0522         | 0.0184       | 3-Hydroxyphenylpropionic acid | Organic acid  |
| 165.092103               | 165.092096             | C <sub>10</sub> H <sub>14</sub> O <sub>2</sub> | 0.046          | N.A                    | N.A           | 0.0147         | N.A          | N.A         | N.A           | N.A            | N.A          | Perillic acid                 | Organic acid  |
| 167.034982               | 167.034984             | C <sub>8</sub> H <sub>8</sub> O <sub>4</sub>   | -0.011         | 0.0276                 | 0.0192        | 0.0589         | 0.0338       | 0.0177      | 0.0807        | 0.0575         | 0.0181       | Vanillic acid                 | Phenolic acid |
| 167.107753               | 167.107712             | C <sub>10</sub> H <sub>16</sub> O <sub>2</sub> | 0.250          | N.A                    | 0.0000        | 0.0078         | 0.0137       | N.A         | N.A           | N.A            | N.A          | Ascaridole                    | Terpenoid     |
| 169.014247               | 169.014232             | C <sub>7</sub> H <sub>6</sub> O <sub>5</sub>   | 0.086          | 0.0269                 | 0.0145        | N.A            | 0.0314       | 0.0660      | 0.0835        | 0.0311         | 0.0861       | Gallic acid                   | Phenolic acid |
| 171.029897               | 171.029886             | C <sub>7</sub> H <sub>8</sub> O <sub>5</sub>   | 0.066          | 0.0412                 | 0.0552        | 0.0176         | 0.0442       | 0.0074      | 0.0252        | 0.0179         | 0.0419       | Dehydroshikimic acid          | Cyclitol      |
| 173.045547               | 173.045548             | C <sub>7</sub> H <sub>10</sub> O <sub>5</sub>  | -0.002         | 3.6492                 | 10.9577       | 0.1565         | 0.8624       | 2.5054      | 12.9735       | 0.2105         | 0.4625       | Shikimic acid                 | Cyclitol      |
| 175.024812               | 175.024792             | C <sub>6</sub> H <sub>8</sub> O <sub>6</sub>   | 0.111          | 0.0593                 | 0.0463        | 0.1291         | 0.0308       | 0.0113      | 0.0924        | 0.0183         | 0.0196       | Ascorbic acid                 | Organic acid  |
| 177.019332               | 177.019358             | C <sub>9</sub> H <sub>6</sub> O <sub>4</sub>   | -0.145         | 0.0039                 | 0.0080        | 0.0073         | N.A          | 0.0056      | 0.0217        | 0.0122         | N.A          | Aesculetin                    | Phenolic acid |
| 179.056112               | 179.056103             | C <sub>6</sub> H <sub>12</sub> O <sub>6</sub>  | 0.049          | 3.8088                 | 1.3235        | 8.8821         | 2.7235       | 0.3644      | 0.8338        | 1.3927         | 0.8881       | Galactose, Glucose            | Carbohydrate  |
| 179.071368               | 179.071362             | C <sub>10</sub> H <sub>12</sub> O <sub>3</sub> | 0.032          | 0.0644                 | 0.0183        | 0.0422         | 0.0701       | 0.0471      | 0.0786        | 0.1202         | 0.0951       | Coniferyl alcohol             | Phenolics     |

|            |            |                                                |        |         |         |         |         |         |         |         |         |                                                                  |                       |
|------------|------------|------------------------------------------------|--------|---------|---------|---------|---------|---------|---------|---------|---------|------------------------------------------------------------------|-----------------------|
| 181.050632 | 181.050648 | C <sub>9</sub> H <sub>10</sub> O <sub>4</sub>  | -0.089 | 0.0226  | 0.0227  | 0.0560  | 0.0298  | 0.1626  | 1.8826  | 0.7474  | 0.0400  | 3-Hydroxy-3-(3-hydroxyphenyl) propionic acid                     | Organic acid          |
| 181.071762 | 181.071767 | C <sub>6</sub> H <sub>14</sub> O <sub>6</sub>  | -0.027 | 0.0293  | 0.0417  | 0.0895  | 0.0918  | 0.0257  | 0.0351  | 0.0806  | 0.0335  | Mannitol                                                         | Carbohydrate          |
| 183.029897 | 183.029882 | C <sub>8</sub> H <sub>8</sub> O <sub>5</sub>   | 0.081  | 0.0216  | 0.0163  | 0.0416  | 0.0318  | 0.0294  | 0.0659  | 0.0320  | N.A     | 4-O-Methylgallic acid                                            | Phenolic acid         |
| 191.019726 | 191.019747 | C <sub>6</sub> H <sub>8</sub> O <sub>7</sub>   | -0.109 | 0.1711  | 1.5996  | 0.2027  | 10.8449 | 0.0567  | 0.1475  | 0.0279  | 4.8480  | Citric acid                                                      | Organic acid          |
| 191.056112 | 191.056111 | C <sub>7</sub> H <sub>12</sub> O <sub>6</sub>  | 0.005  | 22.9830 | 23.9673 | 11.6666 | 55.2903 | 14.7940 | 18.7235 | 1.5621  | 70.7379 | Quinic acid                                                      | Organic acid/cyclitol |
| 193.035376 | 193.035406 | C <sub>6</sub> H <sub>10</sub> O <sub>7</sub>  | -0.153 | 0.1696  | 0.1088  | 0.7298  | 0.1675  | 0.0269  | 0.0660  | 0.0224  | 0.0427  | Glucuronic acid                                                  | Carbohydrate          |
| 193.071762 | 193.071780 | C <sub>7</sub> H <sub>14</sub> O <sub>6</sub>  | -0.095 | 0.4668  | 0.4796  | 3.4147  | 0.5316  | 0.3752  | 0.5123  | 0.8126  | 0.6198  | Ononitol, pinitol                                                | Cyclitol              |
| 195.051026 | 195.051049 | C <sub>6</sub> H <sub>12</sub> O <sub>7</sub>  | -0.118 | 0.2000  | 0.1865  | 0.7258  | 0.2685  | 0.0131  | 0.0305  | 0.0130  | 0.0662  | Gluconic acid                                                    | Carbohydrate          |
| 199.170354 | 199.170392 | C <sub>12</sub> H <sub>24</sub> O <sub>2</sub> | -0.193 | 0.4140  | 0.2453  | 0.8790  | 2.2403  | 0.4296  | 0.3511  | 0.6143  | 2.1537  | Lauric acid                                                      | Fatty acid            |
| 201.113233 | 201.113250 | C <sub>10</sub> H <sub>18</sub> O <sub>4</sub> | -0.086 | 0.1163  | 2.0500  | 0.1011  | 0.2380  | 0.0835  | 0.1702  | 0.1652  | 0.3196  | Sebacic acid                                                     | Organic acid          |
| 205.035376 | 205.035414 | C <sub>7</sub> H <sub>10</sub> O <sub>7</sub>  | -0.186 | 0.2435  | 1.4875  | 1.0430  | 0.3199  | 0.1466  | 0.7364  | 0.1623  | 0.3518  | Glucoascobic acid                                                | Organic acid          |
| 205.087018 | 205.087077 | C <sub>12</sub> H <sub>14</sub> O <sub>3</sub> | -0.288 | 0.0152  | 0.0000  | 0.0243  | N.A     | N.A     | N.A     | N.A     | N.A     | Acetyl eugenol                                                   | Terpenoid             |
| 205.123403 | 205.123416 | C <sub>13</sub> H <sub>18</sub> O <sub>2</sub> | -0.061 | N.A     | 0.0056  | 0.0024  | N.A     | 0.0033  | 0.0090  | N.A     | 0.0117  | Phenyl ethyl-3-methyl butanote                                   | Ester                 |
| 207.051026 | 207.051051 | C <sub>7</sub> H <sub>12</sub> O <sub>7</sub>  | -0.118 | 1.0587  | 0.5353  | 1.7670  | 0.5154  | 0.7563  | 0.5947  | 0.6399  | 0.4683  | 4-O-methyl- $\alpha$ -d-glucuronic acid                          | Carbohydrate          |
| 209.030291 | 209.030317 | C <sub>6</sub> H <sub>10</sub> O <sub>8</sub>  | -0.123 | N.A     | 0.0125  | 0.0059  | 3.1745  | N.A     | N.A     | N.A     | 0.7817  | D-glucaric acid                                                  | Carbohydrate          |
| 209.045547 | 209.045554 | C <sub>10</sub> H <sub>10</sub> O <sub>5</sub> | -0.032 | 0.0635  | 0.0429  | N.A     | 0.0299  | 0.0591  | 0.5118  | 0.1427  | 0.0302  | Hydroxyferulic acid                                              | Phenolic acid         |
| 209.081932 | 209.081962 | C <sub>11</sub> H <sub>14</sub> O <sub>4</sub> | -0.142 | N.A     | 0.0100  | 0.0166  | 0.0311  | 0.0138  | 0.0000  | 0.0355  | 0.0175  | Sinapyl alcohol                                                  | Phenolics             |
| 209.154703 | 209.154741 | C <sub>13</sub> H <sub>22</sub> O <sub>2</sub> | -0.179 | 0.0093  | 0.0080  | 0.0168  | 0.0295  | 0.0131  | 0.0185  | 0.0127  | 0.0626  | Isobornyl propionate, 3-methyl butanoic acid, 2- methyl butyrate | Terpenoid             |
| 225.076847 | 225.076847 | C <sub>11</sub> H <sub>14</sub> O <sub>5</sub> | 0.000  | 0.0432  | 0.0992  | 0.0422  | N.A     | 0.0454  | 0.1112  | 0.0405  | 0.0225  | Dihydrosinapic acid                                              | Phenolics             |
| 227.201654 | 227.201655 | C <sub>14</sub> H <sub>28</sub> O <sub>2</sub> | -0.006 | 0.8229  | 0.4212  | 0.4583  | 1.3523  | 0.8053  | 0.6180  | 1.1890  | 1.3747  | Myristic acid                                                    | Fatty acid            |
| 245.081932 | 245.081964 | C <sub>14</sub> H <sub>14</sub> O <sub>4</sub> | -0.128 | 0.0061  | N.A     | 0.0509  | N.A     | N.A     | N.A     | N.A     | N.A     | Dihydropiceatannol                                               | Stilbenoid            |
| 253.092891 | 253.092894 | C <sub>9</sub> H <sub>18</sub> O <sub>8</sub>  | -0.012 | 5.1403  | 1.5326  | 4.5794  | 2.5637  | 4.4624  | 2.8309  | 11.1923 | 1.1328  | Galactosyl glycerol                                              | Carbohydrate          |
| 255.066282 | 255.066473 | C <sub>15</sub> H <sub>12</sub> O <sub>4</sub> | -0.747 | N.A     | N.A     | N.A     | N.A     | N.A     | 0.0091  | N.A     | N.A     | Pinocembrin                                                      | Flavanone             |
| 269.045547 | 269.045701 | C <sub>15</sub> H <sub>10</sub> O <sub>5</sub> | -0.405 | N.A     | N.A     | 0.0082  | N.A     | N.A     | N.A     | N.A     | N.A     | Apigenin                                                         | Flavone               |
| 271.061197 | 271.061189 | C <sub>15</sub> H <sub>12</sub> O <sub>5</sub> | 0.029  | 0.0139  | 0.0055  | 0.0168  | N.A     | 0.0410  | 0.0445  | 0.0392  | 0.0331  | Naringenin                                                       | Flavanone             |
| 271.082326 | 271.082336 | C <sub>12</sub> H <sub>16</sub> O <sub>7</sub> | -0.037 | 0.0997  | 0.0539  | 0.1260  | 0.0459  | 0.0896  | 0.1581  | 0.0841  | 0.0292  | Arbutin                                                          | Glucoside             |
| 273.076847 | 273.076874 | C <sub>15</sub> H <sub>14</sub> O <sub>5</sub> | -0.099 | 0.0151  | 0.0066  | 0.0403  | 0.0172  | 0.0131  | 0.0338  | 0.0552  | 0.0141  | Epiafzelechin                                                    | Flavan-3-ol           |
| 281.087806 | 281.087803 | C <sub>10</sub> H <sub>18</sub> O <sub>9</sub> | 0.008  | 0.4188  | 0.1905  | 0.7979  | 0.2744  | 0.2242  | 0.1624  | 0.2973  | 0.0849  | Xylobiose                                                        | Carbohydrate          |
| 285.040462 | 285.040449 | C <sub>15</sub> H <sub>10</sub> O <sub>6</sub> | 0.046  | 0.0328  | 0.0409  | 0.0939  | 0.0678  | 0.2383  | 0.5172  | 0.1383  | 0.2533  | Kaempferol                                                       | Flavonol              |
| 285.076847 | 285.076840 | C <sub>16</sub> H <sub>14</sub> O <sub>5</sub> | 0.025  | N.A     | 0.0074  | 0.0094  | N.A     | 0.0432  | 0.0350  | 0.0122  | N.A     | Dihydrobiochanin A                                               | Flavanone             |
| 285.113233 | 285.113211 | C <sub>17</sub> H <sub>18</sub> O <sub>4</sub> | 0.078  | N.A     | N.A     | 0.0038  | N.A     | N.A     | N.A     | N.A     | N.A     | 4'-Hydroxy-3,4,5-trimethoxystilbene                              | Stilbenoid            |
| 287.056112 | 287.056121 | C <sub>15</sub> H <sub>12</sub> O <sub>6</sub> | -0.031 | 0.0273  | 0.1005  | 0.1248  | 0.0208  | 0.0413  | 0.2302  | 0.0759  | 0.0172  | Aromadendrin                                                     | Flavanonol            |
| 289.071762 | 289.071774 | C <sub>15</sub> H <sub>14</sub> O <sub>6</sub> | -0.042 | 0.6903  | 1.4823  | 9.9572  | 0.3815  | 0.8180  | 1.8374  | 4.4030  | 0.3523  | Catechin                                                         | Flavan-3-ol           |
| 297.097976 | 297.097958 | C <sub>14</sub> H <sub>18</sub> O <sub>7</sub> | 0.062  | 0.0586  | 0.4008  | 0.0557  | 0.0153  | 0.0522  | 0.4432  | 0.0292  | 0.0208  | Picein                                                           | Phenolic glycoside    |

|            |            |                                                 |        |        |        |        |        |         |        |         |        |                                                              |                    |
|------------|------------|-------------------------------------------------|--------|--------|--------|--------|--------|---------|--------|---------|--------|--------------------------------------------------------------|--------------------|
| 299.077241 | 299.077243 | C <sub>13</sub> H <sub>16</sub> O <sub>8</sub>  | -0.006 | 0.3719 | 0.5648 | 0.2519 | 0.0689 | 0.3274  | 0.8861 | 0.1409  | 0.0721 | 4-Hydroxybenzoic acid 4-O-glucoside                          | Phenolic acid      |
| 299.165268 | 299.165248 | C <sub>19</sub> H <sub>24</sub> O <sub>3</sub>  | 0.0695 | N.A    | N.A    | 0.0026 | 0.0140 | N.A     | N.A    | N.A     | N.A    | Z-bornyl-p-coumarate                                         | Phenolics          |
| 299.201654 | 299.201618 | C <sub>20</sub> H <sub>28</sub> O <sub>2</sub>  | 0.119  | 0.3053 | 0.1607 | 0.1684 | 0.7876 | 1.5957  | 2.9240 | 0.9791  | 1.1685 | Dehydroabietic acid                                          | Terpenoid          |
| 301.035376 | 301.035357 | C <sub>15</sub> H <sub>10</sub> O <sub>7</sub>  | 0.064  | 0.0385 | 0.0221 | 0.2075 | 0.0378 | 0.2894  | 0.4068 | 0.2263  | 0.0882 | Quercetin                                                    | Flavonol           |
| 301.092891 | 301.092851 | C <sub>13</sub> H <sub>18</sub> O <sub>8</sub>  | 0.135  | 0.1838 | 0.1563 | 0.1387 | 0.0660 | 0.0770  | N.A    | 0.0608  | 0.0394 | Tachioside                                                   | Phenolic glycoside |
| 301.217304 | 301.217322 | C <sub>20</sub> H <sub>30</sub> O <sub>2</sub>  | -0.061 | 0.1188 | 0.0747 | 0.4042 | 0.0883 | 19.5199 | 6.4120 | 38.3494 | 0.9515 | Abietic acid                                                 | Terpenoid          |
| 303.051026 | 303.051039 | C <sub>15</sub> H <sub>12</sub> O <sub>7</sub>  | -0.042 | 0.2077 | 0.2741 | 0.1098 | 0.2133 | 0.2900  | 0.3677 | 0.0854  | 0.1970 | Taxifolin                                                    | Flavanonol         |
| 303.087412 | 303.087392 | C <sub>16</sub> H <sub>16</sub> O <sub>6</sub>  | 0.065  | 0.0180 | 0.0168 | 0.0176 | N.A    | 0.0158  | 0.0358 | 0.0281  | N.A    | 3'-O-methylcatechin                                          | Flavan-3-ol        |
| 303.232954 | 303.232924 | C <sub>20</sub> H <sub>32</sub> O <sub>2</sub>  | 0.100  | 0.0809 | 0.0450 | 0.0586 | 0.2214 | 0.1584  | 0.0517 | 0.1614  | 0.3541 | Anticopalic acid                                             | Terpenoid          |
| 305.066676 | 305.066693 | C <sub>15</sub> H <sub>14</sub> O <sub>7</sub>  | -0.055 | 0.8645 | 0.9429 | 1.3191 | 0.3084 | 0.9643  | 1.1187 | 0.3924  | 0.2984 | Gallocatechol                                                | Flavan-3-ol        |
| 305.248604 | 305.248586 | C <sub>20</sub> H <sub>34</sub> O <sub>2</sub>  | 0.059  | 0.0110 | 0.0051 | 0.0176 | 0.0249 | 0.1505  | 0.0540 | 0.0934  | 0.0458 | 18-Hydroxymanool                                             | Terpenoid          |
| 311.222783 | 311.222757 | C <sub>18</sub> H <sub>32</sub> O <sub>4</sub>  | 0.085  | 0.0143 | 0.0072 | 0.0191 | 0.0210 | 0.0235  | 0.0229 | 0.0418  | 0.0215 | Oxo-dihydroxyoctadecenoic acid                               | Fatty acid         |
| 315.072156 | 315.072167 | C <sub>13</sub> H <sub>16</sub> O <sub>9</sub>  | -0.035 | 0.7287 | 1.6206 | 1.0104 | 0.1959 | 0.3659  | 1.8818 | 0.3741  | 0.1368 | Protocatechuic acid 4-O-glucoside                            | Phenolic glycoside |
| 315.108541 | 315.108536 | C <sub>14</sub> H <sub>20</sub> O <sub>8</sub>  | 0.016  | 0.1015 | 0.1186 | 0.0882 | 0.0311 | 0.0665  | 0.1790 | 0.0502  | 0.0267 | 3,4-Dimethoxyphenyl-beta-D-glucopyranoside                   | Phenolic glycoside |
| 315.196568 | 315.196543 | C <sub>20</sub> H <sub>28</sub> O <sub>3</sub>  | 0.082  | 0.0193 | 0.0245 | 0.0960 | 0.1923 | 0.2243  | 0.3767 | 0.1724  | 0.0675 | 12-Hydroxydehydroabietic Acid                                | Terpenoid          |
| 317.030291 | 317.030288 | C <sub>15</sub> H <sub>10</sub> O <sub>8</sub>  | 0.011  | 0.0219 | 0.0361 | 0.0179 | 0.0369 | 0.2083  | 0.6980 | 0.0168  | 0.0802 | Myricetin                                                    | Flavonoid          |
| 317.066676 | 317.066679 | C <sub>16</sub> H <sub>14</sub> O <sub>7</sub>  | -0.007 | 0.0254 | 0.0117 | 0.1250 | N.A    | 0.0319  | 0.0571 | 0.0498  | N.A    | Cedeodarin                                                   | Phenolics          |
| 317.212218 | 317.212192 | C <sub>20</sub> H <sub>30</sub> O <sub>3</sub>  | 0.082  | 0.0128 | 0.0139 | 0.0234 | 0.0362 | 0.3612  | 0.1082 | 0.2271  | 0.0318 | 3-oxoanticopalic Acid                                        | Terpenoid          |
| 319.045941 | 319.045942 | C <sub>15</sub> H <sub>12</sub> O <sub>8</sub>  | -0.004 | 0.0878 | 0.1798 | 0.0931 | 0.1243 | 0.1246  | 0.1891 | 0.0402  | 0.1068 | Ampelopsin                                                   | Flavanonol         |
| 319.082326 | 319.082334 | C <sub>16</sub> H <sub>16</sub> O <sub>7</sub>  | -0.024 | 0.0363 | 0.0325 | 0.0523 | N.A    | 0.0486  | 0.3598 | 0.1146  | N.A    | 4'-O-Methylepigallocatechin                                  | Flavan-3-ol        |
| 319.227868 | 319.227853 | C <sub>20</sub> H <sub>32</sub> O <sub>3</sub>  | 0.047  | 0.0238 | 0.0067 | 1.1018 | 0.0205 | 0.7531  | 0.0939 | 21.1421 | 0.0311 | Isocupressic/hydroxyanticopalic agatholic/imbricataloic acid | Terpenoid          |
| 321.082720 | 321.082739 | C <sub>12</sub> H <sub>18</sub> O <sub>10</sub> | -0.058 | 0.8884 | 1.1336 | 0.4021 | 0.0358 | 0.7773  | 1.8078 | 0.0433  | 0.0217 | Lepidimoic acid                                              | Carbohydrate       |
| 321.243519 | 321.243307 | C <sub>20</sub> H <sub>34</sub> O <sub>3</sub>  | 0.658  | N.A    | N.A    | 0.0118 | N.A    | N.A     | N.A    | N.A     | N.A    | Imbricataloic acid, Dihydroagatholic acid                    | Terpenoid          |
| 323.077241 | 323.077261 | C <sub>15</sub> H <sub>16</sub> O <sub>8</sub>  | -0.062 | 0.0254 | 0.0161 | 0.0290 | N.A    | 0.0198  | 0.0417 | 0.0302  | 0.0110 | Skimmin                                                      | Phenolic glycoside |
| 325.092891 | 325.092857 | C <sub>15</sub> H <sub>18</sub> O <sub>8</sub>  | 0.106  | 0.5181 | 0.4396 | 0.2439 | 0.0604 | 0.3178  | 0.5199 | 0.1166  | 0.0709 | p-Coumaric acid glucoside                                    | Phenolic glycoside |
| 325.114020 | 325.114029 | C <sub>12</sub> H <sub>22</sub> O <sub>10</sub> | -0.027 | 1.3108 | 0.3616 | 0.5340 | 0.0720 | 0.4198  | 0.4374 | 0.2644  | 0.0567 | Rutinose                                                     | Carbohydrate       |
| 327.123797 | 327.123871 | C <sub>19</sub> H <sub>20</sub> O <sub>5</sub>  | -0.224 | 0.0047 | N.A    | 0.0161 | N.A    | N.A     | N.A    | N.A     | N.A    | Demethoxypinoresinol                                         | Lignan             |
| 327.196568 | 327.196543 | C <sub>21</sub> H <sub>28</sub> O <sub>3</sub>  | 0.095  | N.A    | 0.0044 | N.A    | N.A    | N.A     | N.A    | 0.0075  | N.A    | 7-Oxodehydroabietic acid, methyl ester                       | Terpenoid          |
| 329.066676 | 329.066661 | C <sub>17</sub> H <sub>14</sub> O <sub>7</sub>  | 0.046  | 0.0104 | 0.0060 | N.A    | N.A    | 0.1170  | 0.0673 | 0.0526  | N.A    | Quercetin 3,4'-dimethyl ether                                | Flavonol           |
| 331.067070 | 331.067073 | C <sub>13</sub> H <sub>16</sub> O <sub>10</sub> | -0.008 | 0.2255 | 0.5936 | 0.1239 | 0.0373 | 0.1368  | 0.4031 | 0.0437  | 0.0377 | Monogalloyl-glucose                                          | Phenolic glycoside |
| 331.155097 | 331.155066 | C <sub>19</sub> H <sub>24</sub> O <sub>5</sub>  | 0.096  | 0.0063 | 0.0057 | 0.0050 | N.A    | 0.0079  | 0.0129 | N.A     | N.A    | Gibberellin A20                                              | Terpenoid          |
| 331.176227 | 331.176240 | C <sub>16</sub> H <sub>28</sub> O <sub>7</sub>  | -0.041 | 0.3207 | 0.1535 | 0.3128 | 0.0666 | 0.2229  | 0.1796 | 0.0667  | 0.0583 | 2-Hydroxy-1,8-cineole-glucopyranoside                        | Terpene glycoside  |
| 333.207133 | 333.207101 | C <sub>20</sub> H <sub>30</sub> O <sub>4</sub>  | 0.095  | 0.0469 | 0.0752 | 0.1099 | 0.0532 | 1.2129  | 0.8122 | 0.1660  | 0.4949 | Dehydropinifolic acid                                        | Terpenoid          |
| 335.222783 | 335.222752 | C <sub>20</sub> H <sub>32</sub> O <sub>4</sub>  | 0.093  | 0.0976 | 0.0173 | 0.2265 | 0.0422 | 3.5120  | 0.0538 | 0.1899  | 0.0707 | Pinifolic acid                                               | Terpenoid          |

|            |            |                                                 |        |         |         |        |        |         |        |        |        |                                             |                    |
|------------|------------|-------------------------------------------------|--------|---------|---------|--------|--------|---------|--------|--------|--------|---------------------------------------------|--------------------|
| 337.092891 | 337.092906 | C <sub>16</sub> H <sub>18</sub> O <sub>8</sub>  | -0.045 | 0.3317  | 5.2135  | 0.9184 | 0.2923 | 0.1841  | 9.0672 | 0.4875 | 0.1254 | 3-p-Coumaroylquinic acid                    | Phenolic acid      |
| 339.072156 | 339.072152 | C <sub>15</sub> H <sub>16</sub> O <sub>9</sub>  | 0.010  | 0.0251  | 0.0150  | N.A    | N.A    | 0.0248  | 0.0431 | 0.0111 | N.A    | Aesculin                                    | Phenolic glycoside |
| 341.087806 | 341.087840 | C <sub>15</sub> H <sub>18</sub> O <sub>9</sub>  | -0.102 | 0.1227  | 0.4250  | 0.6781 | N.A    | 0.1105  | 0.4676 | 0.0772 | 0.0240 | Glucocaffeic acid                           | Phenolic glycoside |
| 341.108935 | 341.108930 | C <sub>12</sub> H <sub>22</sub> O <sub>11</sub> | 0.014  | 1.5522  | 0.9974  | N.A    | 1.2741 | 1.7211  | 0.9897 | 2.0063 | 0.5898 | Sucrose                                     | Carbohydrate       |
| 341.124191 | 341.124179 | C <sub>16</sub> H <sub>22</sub> O <sub>8</sub>  | 0.035  | 0.0604  | 0.0395  | N.A    | N.A    | 0.0562  | 0.0840 | 0.0715 | 0.0143 | Coniferin                                   | Phenolic glycoside |
| 343.082326 | 343.082251 | C <sub>18</sub> H <sub>16</sub> O <sub>7</sub>  | 0.220  | 0.0175  | N.A     | 0.0193 | N.A    | N.A     | N.A    | N.A    | N.A    | Cirsilineol                                 | Flavone            |
| 343.139841 | 343.139842 | C <sub>16</sub> H <sub>24</sub> O <sub>8</sub>  | -0.001 | 0.1100  | 0.0925  | N.A    | 0.0189 | 0.0738  | 0.1377 | 0.0658 | 0.0233 | Dihydroconiferin                            | Phenolic glycoside |
| 345.061591 | 345.061568 | C <sub>17</sub> H <sub>14</sub> O <sub>8</sub>  | 0.068  | 0.0296  | 0.0097  | 0.0751 | 0.0124 | 0.0750  | 0.0375 | 0.0247 | 0.0106 | Syringetin                                  | Flavonol           |
| 345.134362 | 345.134375 | C <sub>19</sub> H <sub>22</sub> O <sub>6</sub>  | -0.037 | 0.2161  | 0.0363  | 0.1291 | N.A    | 0.0319  | 0.0350 | 0.0439 | N.A    | Taxiresinol                                 | Lignan             |
| 345.207133 | 345.207130 | C <sub>21</sub> H <sub>30</sub> O <sub>4</sub>  | 0.010  | 0.0070  | N.A     | N.A    | 0.0317 | N.A     | N.A    | N.A    | N.A    | Pinusolide                                  | Terpenoid          |
| 349.238433 | 349.238470 | C <sub>21</sub> H <sub>34</sub> O <sub>4</sub>  | -0.107 | 0.1325  | 0.0000  | 0.0084 | 0.0193 | 20.2415 | 0.0136 | 0.2060 | 0.0233 | Pinifolate, Nor-16-acetylimbricatolic       | Terpenoid          |
| 353.087806 | 353.087826 | C <sub>16</sub> H <sub>18</sub> O <sub>9</sub>  | -0.057 | 0.0389  | 0.1067  | 0.2813 | N.A    | 0.0290  | 0.1271 | 0.0292 | N.A    | Chlorogenic acid                            | Phenolic acid      |
| 353.108935 | 353.108962 | C <sub>13</sub> H <sub>22</sub> O <sub>11</sub> | -0.076 | 18.1855 | 21.4535 | 0.9814 | 0.6479 | 3.5868  | 9.1686 | 0.1742 | 0.3340 | Methylene sucrose                           | Carbohydrate       |
| 355.067070 | 355.067101 | C <sub>15</sub> H <sub>16</sub> O <sub>10</sub> | -0.085 | 0.0112  | 0.0088  | 0.0091 | 0.0117 | 0.0067  | 0.0142 | N.A    | N.A    | Caffeic acid 3-O-glucuronide                | Phenolic glycoside |
| 355.103456 | 355.103455 | C <sub>16</sub> H <sub>20</sub> O <sub>9</sub>  | 0.001  | 0.4056  | 0.4255  | 3.0177 | 0.0380 | 0.3406  | 0.5210 | 0.3050 | 0.0280 | 1-O-Feruloyl-beta-D-glucose                 | Phenolic glycoside |
| 357.082720 | 357.082686 | C <sub>15</sub> H <sub>18</sub> O <sub>10</sub> | 0.096  | 0.0377  | 0.0343  | 0.0516 | N.A    | 0.0364  | 0.0489 | 0.0107 | N.A    | Dihydrocaffeic acid 3-O-glucuronide         | Phenolic glycoside |
| 357.119106 | 357.119101 | C <sub>16</sub> H <sub>22</sub> O <sub>9</sub>  | 0.014  | 0.1576  | 1.6374  | 0.2719 | 0.0454 | 0.1400  | 2.0615 | 0.0548 | 0.0177 | Junipediol B 8-glucoside                    | Phenolic glycoside |
| 357.134362 | 357.134403 | C <sub>20</sub> H <sub>22</sub> O <sub>6</sub>  | -0.115 | 0.0130  | N.A     | 0.0230 | N.A    | N.A     | N.A    | N.A    | N.A    | Pinoresinol                                 | Lignan             |
| 359.077241 | 359.077239 | C <sub>18</sub> H <sub>16</sub> O <sub>8</sub>  | 0.005  | 0.0164  | 0.0120  | 0.0468 | N.A    | 0.0235  | 0.0285 | 0.0152 | N.A    | Irigenin                                    | Flavone            |
| 359.134756 | 359.134738 | C <sub>16</sub> H <sub>24</sub> O <sub>9</sub>  | 0.050  | 0.1604  | 0.0788  | 0.5916 | 0.0295 | 0.0854  | 0.1072 | 0.1592 | 0.0195 | Junipediol A 8-glucoside                    | Phenyl propanoid   |
| 359.150012 | 359.150016 | C <sub>20</sub> H <sub>24</sub> O <sub>6</sub>  | -0.012 | N.A     | 0.0081  | N.A    | 0.0115 | 0.0078  | 0.0127 | N.A    | N.A    | Lariciresinol                               | Lignan             |
| 359.222783 | 359.222765 | C <sub>22</sub> H <sub>32</sub> O <sub>4</sub>  | 0.030  | 0.0252  | 0.0061  | 0.0097 | 0.0212 | 0.1211  | 0.1185 | 0.0907 | 0.0102 | 7-Acetoxyabietic acid                       | Terpenoid          |
| 361.165662 | 361.165663 | C <sub>20</sub> H <sub>26</sub> O <sub>6</sub>  | -0.003 | 0.0205  | 0.0159  | 0.0296 | 0.0250 | 0.0142  | 0.0308 | 0.0169 | N.A    | Secoisolariciresinol                        | Lignan             |
| 361.238433 | 361.238418 | C <sub>22</sub> H <sub>34</sub> O <sub>4</sub>  | 0.042  | 0.0132  | 0.0000  | 0.0083 | N.A    | N.A     | N.A    | N.A    | N.A    | Acetoxyanticopalic, Acetylisocupressic acid | Terpenoid          |
| 363.254083 | 363.254092 | C <sub>22</sub> H <sub>36</sub> O <sub>4</sub>  | -0.025 | 0.0110  | 0.0039  | N.A    | 0.0136 | 0.4605  | 0.0513 | 0.3891 | N.A    | Acetylimbricatolic acid                     | Terpenoid          |
| 367.103456 | 367.103455 | C <sub>17</sub> H <sub>20</sub> O <sub>9</sub>  | 0.002  | 0.1194  | 0.2885  | 0.0976 | 0.0267 | 0.0774  | 0.4243 | 0.0247 | 0.0106 | 3-Feruloylquinic acid                       | Phenolic acid      |
| 369.082720 | 369.082669 | C <sub>16</sub> H <sub>18</sub> O <sub>10</sub> | 0.141  | 0.0265  | N.A     | 0.0676 | N.A    | N.A     | N.A    | N.A    | N.A    | Ferulic acid 4-O-glucuronide                | Phenolic glycoside |
| 371.098370 | 371.098371 | C <sub>16</sub> H <sub>20</sub> O <sub>10</sub> | 0.000  | 0.0511  | 0.0610  | 0.0702 | N.A    | 0.0408  | 0.0822 | 0.0106 | N.A    | Dihydroferulic acid 4-O-glucuronide         | Phenolic glycoside |
| 371.119500 | 371.119486 | C <sub>13</sub> H <sub>24</sub> O <sub>12</sub> | 0.037  | 19.1510 | 8.2637  | 9.8507 | 8.7571 | 6.9002  | 3.1312 | 0.4502 | 4.2103 | Galactosyl pinitol                          | Cyclitol           |
| 371.134756 | 371.134716 | C <sub>17</sub> H <sub>24</sub> O <sub>9</sub>  | 0.109  | 0.1323  | 0.1029  | 0.0752 | 0.0264 | N.A     | N.A    | N.A    | N.A    | Syringin                                    | Phenolic glycoside |
| 373.092891 | 373.092880 | C <sub>19</sub> H <sub>18</sub> O <sub>8</sub>  | 0.029  | 0.0158  | 0.0099  | 0.0430 | N.A    | 0.0163  | N.A    | 0.0137 | N.A    | Junipegenin C                               | Flavone            |
| 375.144927 | 375.144909 | C <sub>20</sub> H <sub>24</sub> O <sub>7</sub>  | 0.046  | 0.0134  | N.A     | 0.0210 | N.A    | N.A     | N.A    | N.A    | N.A    | Todolactol A                                | Lignan             |
| 385.092891 | 385.092937 | C <sub>20</sub> H <sub>18</sub> O <sub>8</sub>  | -0.120 | 0.0289  | 0.0076  | 0.4560 | N.A    | 0.0103  | 0.0183 | N.A    | N.A    | Diferulic acid                              | Phenolic acid      |
| 385.150406 | 385.150404 | C <sub>18</sub> H <sub>26</sub> O <sub>9</sub>  | 0.006  | 0.2092  | 0.0589  | 0.0418 | 0.0412 | 0.1420  | 0.1096 | 0.0240 | 0.0227 | Juniperoside                                | Phenolic glycoside |



|            |            |                                                 |        |        |        |        |        |        |        |        |        |                                                        |                     |
|------------|------------|-------------------------------------------------|--------|--------|--------|--------|--------|--------|--------|--------|--------|--------------------------------------------------------|---------------------|
| 385.186791 | 385.186843 | C <sub>19</sub> H <sub>30</sub> O <sub>8</sub>  | -0.134 | 0.0625 | 0.0466 | 0.1712 | 0.0146 | 0.0526 | 0.0805 | 0.0312 | 0.0122 | Junipeionoloside, Corchoionoside C                     | Terpene glycoside   |
| 387.144927 |            | C <sub>21</sub> H <sub>24</sub> O <sub>7</sub>  |        | N.A    | N.A    | 0.0077 | N.A    | 0.0057 | 0.0120 | 0.0061 | N.A    | Dihydrosamidin                                         | Benzopyranone       |
| 389.124191 | 389.124199 | C <sub>20</sub> H <sub>22</sub> O <sub>8</sub>  | -0.020 | 0.0433 | 0.0520 | N.A    | N.A    | 0.0438 | 0.0809 | 0.0197 | N.A    | Piceid                                                 | Stilbenoid          |
| 389.145321 | 389.145332 | C <sub>17</sub> H <sub>26</sub> O <sub>10</sub> | -0.030 | 0.0869 | 0.0495 | 0.2072 | N.A    | 0.1008 | 0.1107 | 0.0938 | N.A    | Loganin                                                | Terpenoid           |
| 389.160577 | 389.160579 | C <sub>21</sub> H <sub>26</sub> O <sub>7</sub>  | -0.005 | 0.0061 | N.A    | 0.0301 | N.A    | N.A    | N.A    | N.A    | N.A    | 5'-Methoxylariciresinol                                | Lignan              |
| 397.114020 | 397.113982 | C <sub>18</sub> H <sub>22</sub> O <sub>10</sub> | 0.099  | 0.0205 | 0.0131 | 0.0439 | N.A    | 0.0208 | 0.0217 | 0.0097 | N.A    | 3-Sinapoylquinic acid                                  | Phenolic acid       |
| 397.129277 | 397.129217 | C <sub>22</sub> H <sub>22</sub> O <sub>7</sub>  | 0.150  | N.A    | N.A    | 0.0046 | N.A    | N.A    | N.A    | N.A    | N.A    | deoxypodophyllotoxin                                   | Lignan              |
| 399.217698 | 399.217642 | C <sub>24</sub> H <sub>32</sub> O <sub>5</sub>  | 0.140  | 0.0179 | 0.0059 | 0.0408 | N.A    | 0.0284 | 0.0644 | 0.0109 | N.A    | Succinyl 7-oxodehydroabietol                           | Terpenoid           |
| 405.119106 | 405.119090 | C <sub>20</sub> H <sub>22</sub> O <sub>9</sub>  | 0.039  | 0.0208 | 0.7188 | 0.0670 | 0.0370 | 0.0257 | 0.9813 | 0.0224 | N.A    | Astringin                                              | Stilbenoid          |
| 415.103456 | 415.103347 | C <sub>21</sub> H <sub>20</sub> O <sub>9</sub>  | 0.262  | 0.0164 | 0.0000 | 0.1250 | N.A    | N.A    | N.A    | N.A    | N.A    | Apigenin 7-rhamnoside                                  | Flavonoid           |
| 417.082720 | 417.082706 | C <sub>20</sub> H <sub>18</sub> O <sub>10</sub> | 0.034  | 0.0528 | 0.0186 | 0.1706 | N.A    | 0.0118 | 0.0429 | 0.0445 | N.A    | Salvianolic acid G                                     | Coumaric acid       |
| 417.155491 | 417.155517 | C <sub>22</sub> H <sub>26</sub> O <sub>8</sub>  | -0.060 | 0.0047 | N.A    | 0.0174 | N.A    | N.A    | N.A    | N.A    | N.A    | Syringaresinol                                         | Lignan              |
| 419.243912 | 419.243864 | C <sub>24</sub> H <sub>36</sub> O <sub>6</sub>  | 0.115  | 0.0045 | 0.0180 | 0.0040 | N.A    | N.A    | N.A    | N.A    | N.A    | Succinylisocupresic, succinylagatholic                 | Terpenoid           |
| 429.373804 | 429.373750 | C <sub>29</sub> H <sub>50</sub> O <sub>2</sub>  | 0.126  | N.A    | N.A    | N.A    | N.A    | 0.0193 | 0.0155 | 0.0269 | N.A    | β-Tocopherol                                           | Lipid               |
| 431.098370 | 431.098351 | C <sub>21</sub> H <sub>20</sub> O <sub>10</sub> | 0.046  | 0.0516 | 0.0369 | 0.2117 | 0.0350 | 0.0407 | 0.0583 | 0.0460 | 0.0303 | Kaempferol-3-O-rhamnoside                              | Flavonoid           |
| 433.077635 | 433.077610 | C <sub>20</sub> H <sub>18</sub> O <sub>11</sub> | 0.058  | 0.0253 | 0.0161 | 0.1527 | N.A    | 0.0172 | 0.0125 | 0.0559 | N.A    | Quercetin 3-O-arabinoside                              | Flavonoid           |
| 433.114020 | 433.114105 | C <sub>21</sub> H <sub>22</sub> O <sub>10</sub> | -0.195 | 0.0748 | 0.0511 | 0.1844 | 0.0210 | 0.0442 | 0.0547 | 0.0327 | 0.0166 | Aromadendrin 7-O-rhamnoside, Naringenin glucoside      | Flavonoid           |
| 435.129671 | 435.129692 | C <sub>21</sub> H <sub>24</sub> O <sub>10</sub> | -0.050 | 0.0311 | 0.0463 | 0.0877 | N.A    | 0.0298 | 0.0972 | 0.0324 | N.A    | Phloridzin                                             | Phenolic glycoside  |
| 435.296342 | 435.296324 | C <sub>22</sub> H <sub>44</sub> O <sub>8</sub>  | 0.040  | 2.1306 | 0.5119 | 1.0916 | 0.2507 | 0.3753 | 0.1812 | 0.2703 | 0.1789 | Sorbitol palmitate                                     | Polysorbate         |
| 447.093285 | 447.093306 | C <sub>21</sub> H <sub>20</sub> O <sub>11</sub> | -0.047 | 0.1627 | 0.1063 | 0.2995 | 0.2887 | 0.1462 | 0.1508 | 0.0376 | 0.9551 | Astragaln, Quercitrin, Kaempferol 7-O-glucoside        | Flavonoid           |
| 449.072550 | 449.072638 | C <sub>20</sub> H <sub>18</sub> O <sub>12</sub> | -0.197 | 0.0072 | N.A    | N.A    | N.A    | N.A    | N.A    | N.A    | N.A    | Myricetin 3-O-arabinoside                              | Flavonoid           |
| 449.108935 | 449.108971 | C <sub>21</sub> H <sub>22</sub> O <sub>11</sub> | -0.079 | 0.0540 | 0.0321 | 0.3649 | N.A    | 0.0359 | 0.0517 | 0.0596 | N.A    | Taxifolin 7-O-rhamnoside                               | Flavonoid           |
| 451.124585 | 451.124593 | C <sub>21</sub> H <sub>24</sub> O <sub>11</sub> | -0.018 | 0.0567 | 0.0666 | 0.3779 | 0.0127 | 0.0496 | 0.2356 | 0.1262 | N.A    | Catechin-3-glucoside                                   | Flavonoid glucoside |
| 457.077635 | 457.077640 | C <sub>22</sub> H <sub>18</sub> O <sub>11</sub> | -0.012 | 0.0083 | 0.0052 | 0.0172 | N.A    | 0.0078 | 0.0171 | N.A    | N.A    | Gallocatechin 3-O-gallate                              | Flavonoid           |
| 459.093285 | 459.093349 | C <sub>22</sub> H <sub>20</sub> O <sub>11</sub> | -0.141 | 0.0171 | 0.0061 | 0.1048 | N.A    | 0.0162 | 0.0534 | 0.0059 | N.A    | Apigenin 7-O-glucuronide methyl ester                  | Flavonoid           |
| 461.108935 | 461.108912 | C <sub>22</sub> H <sub>22</sub> O <sub>11</sub> | 0.051  | 0.0907 | 0.0304 | N.A    | N.A    | 0.0829 | 0.0556 | 0.0174 | N.A    | Chrysoeriol 7-O-glucoside, Isorhamnetin 3-rhamnoside   | Flavonoid           |
| 463.088200 | 463.088211 | C <sub>21</sub> H <sub>20</sub> O <sub>12</sub> | -0.024 | 0.1793 | 0.0364 | 0.4548 | 0.0410 | 0.1968 | 0.0607 | 0.0737 | 0.0988 | Isoquercetin                                           | Flavonoid           |
| 463.327642 | 463.327615 | C <sub>24</sub> H <sub>48</sub> O <sub>8</sub>  | 0.058  | 2.0250 | 0.4219 | 1.4100 | 0.2487 | 0.6189 | 0.2589 | 0.3058 | 0.2092 | Mannitol stearate                                      | Fatty acid ester    |
| 463.342898 | 463.342757 | C <sub>28</sub> H <sub>48</sub> O <sub>5</sub>  | 0.305  | 0.0077 | 0.0000 | N.A    | N.A    | N.A    | N.A    | N.A    | N.A    | Castasterone                                           | Flavonoid glucoside |
| 465.103850 | 465.103841 | C <sub>21</sub> H <sub>22</sub> O <sub>12</sub> | 0.019  | 0.0893 | 0.0576 | 0.2496 | N.A    | 0.1147 | 0.0653 | 0.0314 | 0.0179 | Taxifolin 7-O-beta-D-glucopyranoside                   | Flavonoid           |
| 471.093285 | 471.093401 | C <sub>23</sub> H <sub>20</sub> O <sub>11</sub> | -0.161 | 0.0169 | N.A    | 0.0420 | 0.0149 | N.A    | N.A    | N.A    | N.A    | 4''-O-Methylepigallocatechin 3-O-gallate               | Flavonoid           |
| 473.108935 | 473.108940 | C <sub>23</sub> H <sub>22</sub> O <sub>11</sub> | -0.011 | 0.0088 | N.A    | 0.0395 | N.A    | N.A    | N.A    | N.A    | N.A    | 6''-O-Acetylgenistin, Apigenin 7-(6''-acetylglucoside) | Flavonoid           |
| 477.067464 | 477.067246 | C <sub>21</sub> H <sub>18</sub> O <sub>13</sub> | 0.458  | N.A    | 0.0063 | 0.0054 | N.A    | N.A    | N.A    | N.A    | N.A    | Quercetin 3'-O-glucuronide                             | Flavonoid           |

|            |            |                                                 |        |        |        |        |        |        |        |        |        |                                                                      |                     |
|------------|------------|-------------------------------------------------|--------|--------|--------|--------|--------|--------|--------|--------|--------|----------------------------------------------------------------------|---------------------|
| 477.103850 | 477.103814 | C <sub>22</sub> H <sub>22</sub> O <sub>12</sub> | 0.075  | 0.1410 | 0.1304 | 0.2986 | 0.0197 | 0.1330 | 0.1535 | 0.0181 | 0.0401 | Isorhamnetin 3-glucoside, 3'-O-methylquercetin 3-glucoside           | Flavonoid glucoside |
| 477.176621 | 477.176619 | C <sub>24</sub> H <sub>30</sub> O <sub>10</sub> | 0.004  | 0.0230 | 0.0106 | 0.0541 | N.A    | 0.0196 | 0.0215 | 0.0125 | N.A    | Junipercomnoside A                                                   | Flavonoid glucoside |
| 479.083114 | 479.083093 | C <sub>21</sub> H <sub>20</sub> O <sub>13</sub> | 0.045  | 0.0429 | N.A    | 0.0241 | N.A    | 0.0684 | 0.0170 | 0.0097 | 0.0290 | Myricetin 3-O-glucoside                                              | Flavonoid           |
| 479.337813 | 479.337831 | C <sub>28</sub> H <sub>48</sub> O <sub>6</sub>  | -0.037 | 0.0053 | 0.0055 | 0.0058 | N.A    | 0.0190 | 0.0094 | 0.0105 | N.A    | Brassinolide                                                         | Flavonoid glucoside |
| 481.098764 | 481.098705 | C <sub>21</sub> H <sub>22</sub> O <sub>13</sub> | 0.124  | 0.0255 | 0.0154 | N.A    | N.A    | 0.0338 | 0.0206 | 0.0061 | N.A    | Ampelopsin 7-glucoside                                               | Flavonoid glucoside |
| 489.103850 | 489.103832 | C <sub>23</sub> H <sub>22</sub> O <sub>12</sub> | 0.037  | 0.0599 | 0.0046 | 0.0316 | 0.0178 | 0.0696 | 0.0183 | N.A    | 0.0399 | Kaempferol 3-(6"-acetylglucoside)                                    | Flavonoid glucoside |
| 493.098764 | 493.098749 | C <sub>22</sub> H <sub>22</sub> O <sub>13</sub> | 0.031  | 0.0563 | 0.0720 | 0.0479 | N.A    | 0.0736 | 0.1062 | 0.0103 | 0.0200 | Laricitrin 3-glucoside                                               | Flavonoid glucoside |
| 503.161758 | 503.161774 | C <sub>18</sub> H <sub>32</sub> O <sub>16</sub> | -0.031 | 0.0865 | 0.1998 | 0.6013 | 0.0461 | 0.1517 | 0.1266 | 0.1511 | 0.0289 | Raffinose                                                            | Carbohydrate        |
| 505.098764 | 505.098822 | C <sub>23</sub> H <sub>22</sub> O <sub>13</sub> | -0.115 | 0.2963 | N.A    | 0.0783 | N.A    | 0.4589 | N.A    | 0.0253 | N.A    | Quercetin 3-(6"-acetylglucoside)                                     | Flavonoid glucoside |
| 505.135150 | 505.135130 | C <sub>24</sub> H <sub>26</sub> O <sub>12</sub> | 0.040  | 0.0123 | 0.0151 | 0.0419 | N.A    | 0.0186 | 0.0384 | 0.0097 | N.A    | Junipegenin B 7-O-glucoside                                          | Flavonoid glucoside |
| 505.207921 | 505.207826 | C <sub>26</sub> H <sub>34</sub> O <sub>10</sub> | 0.189  | N.A    | 0.0060 | 0.0930 | N.A    | N.A    | 0.0120 | 0.0179 | N.A    | Icariside E4                                                         | Flavonoid glucoside |
| 507.114414 | 507.114417 | C <sub>23</sub> H <sub>24</sub> O <sub>13</sub> | -0.004 | N.A    | 0.0085 | 0.0331 | N.A    | N.A    | 0.0279 | 0.0073 | N.A    | Syringetin 3-glucoside                                               | Flavonoid glucoside |
| 507.187185 | 507.187207 | C <sub>25</sub> H <sub>32</sub> O <sub>11</sub> | -0.043 | 0.0685 | 0.0422 | 0.2487 | N.A    | 0.0475 | 0.0441 | 0.0174 | 0.0152 | Gibberellin 2-O-beta-D-glucoside                                     | Flavonoid glucoside |
| 519.114414 | 519.114472 | C <sub>24</sub> H <sub>24</sub> O <sub>13</sub> | -0.111 | N.A    | 0.0070 | 0.0229 | N.A    | 0.0880 | 0.0142 | N.A    | 0.0158 | Isorhamnetin 3-(6"-acetylglucoside)                                  | Flavonoid glucoside |
| 521.093679 | 521.093589 | C <sub>23</sub> H <sub>22</sub> O <sub>14</sub> | 0.171  | 0.0144 | N.A    | 0.0034 | N.A    | 0.0212 | N.A    | N.A    | N.A    | Myricetin 3-(6"-acetyl-glucoside)                                    | Flavonoid glucoside |
| 521.130064 | 521.130076 | C <sub>24</sub> H <sub>26</sub> O <sub>13</sub> | -0.022 | 0.0103 | 0.0106 | 0.0225 | N.A    | 0.0149 | 0.0277 | N.A    | N.A    | Iridin                                                               | Flavonoid glucoside |
| 521.202835 | 521.202915 | C <sub>26</sub> H <sub>34</sub> O <sub>11</sub> | -0.153 | 0.0830 | 0.0351 | 0.1077 | N.A    | 0.0671 | 0.0451 | 0.0237 | N.A    | Lariciresinol glycoside                                              | Lignan              |
| 533.202835 | 533.202855 | C <sub>27</sub> H <sub>34</sub> O <sub>11</sub> | -0.036 | 0.0074 | 0.0081 | N.A    | N.A    | N.A    | N.A    | N.A    | N.A    | Arctin                                                               | Lignan              |
| 535.109329 | 535.109337 | C <sub>24</sub> H <sub>24</sub> O <sub>14</sub> | -0.016 | 0.0147 | N.A    | 0.0088 | N.A    | 0.0155 | N.A    | N.A    | N.A    | Laricitrin 3-(6"-acetylglucoside)                                    | Flavonoid glucoside |
| 537.082720 | 537.082672 | C <sub>30</sub> H <sub>18</sub> O <sub>10</sub> | 0.091  | 0.0043 | 0.0000 | 0.0825 | N.A    | 0.0047 | N.A    | 1.5119 | N.A    | sennidin A, Cupressufflavone                                         | Flavonoid           |
| 549.124979 | 549.125086 | C <sub>25</sub> H <sub>26</sub> O <sub>14</sub> | -0.195 | 0.0114 | N.A    | 0.0382 | N.A    | 0.0136 | N.A    | N.A    | N.A    | Syringetin 3-(6"-acetylglucoside)                                    | Flavonoid glucoside |
| 551.098370 | 551.098297 | C <sub>31</sub> H <sub>20</sub> O <sub>10</sub> | 0.134  | N.A    | N.A    | 0.0069 | N.A    | N.A    | N.A    | 0.3289 | N.A    | Bilobetin                                                            | Flavonoid glucoside |
| 555.223571 | 555.223586 | C <sub>30</sub> H <sub>36</sub> O <sub>10</sub> | -0.028 | 0.0064 | 0.0087 | 0.0273 | N.A    | 0.0094 | N.A    | 0.0170 | N.A    | Lariciresinol-sesquillignan                                          | Lignan              |
| 563.140629 | 563.140640 | C <sub>26</sub> H <sub>28</sub> O <sub>14</sub> | -0.020 | 0.0061 | N.A    | 0.0368 | N.A    | N.A    | N.A    | N.A    | N.A    | Apigenin 7-O-aposyl-glucoside                                        | Flavonoid glucoside |
| 575.119500 | 575.119578 | C <sub>30</sub> H <sub>24</sub> O <sub>12</sub> | -0.135 | N.A    | 0.0045 | N.A    | N.A    | 0.0046 | 0.0130 | N.A    | N.A    | Procyanidin A2                                                       | Tannins             |
| 577.135150 | 577.135160 | C <sub>30</sub> H <sub>26</sub> O <sub>12</sub> | -0.017 | 0.0240 | 0.2653 | 0.8991 | N.A    | 0.0274 | 0.1327 | 0.2030 | 0.0292 | Procyanidin B1                                                       | Tannins             |
| 577.156279 | 577.156229 | C <sub>27</sub> H <sub>30</sub> O <sub>14</sub> | 0.087  | 0.0065 | 0.0099 | 0.0144 | 0.3474 | 0.0042 | 0.0153 | N.A    | 0.3937 | Isorhoifolin, Isovitexin rhamnoside                                  | Flavonoid glucoside |
| 579.171929 | 579.172001 | C <sub>27</sub> H <sub>32</sub> O <sub>14</sub> | -0.124 | 0.0086 | 0.6968 | 0.0316 | 0.0255 | 0.0079 | 1.2774 | N.A    | 0.0171 | Naringin                                                             | Flavonoid glucoside |
| 593.130064 | 593.130163 | C <sub>30</sub> H <sub>26</sub> O <sub>13</sub> | -0.166 | 0.1088 | 0.1425 | 0.3786 | 0.0306 | 0.1098 | 0.1187 | 0.0326 | 0.0281 | Kaempferol 3-(6"-coumaroyl-glucoside), Epigallocatechin-(4)-catechin | Flavonoid           |
| 593.151194 | 593.151248 | C <sub>27</sub> H <sub>30</sub> O <sub>15</sub> | -0.091 | 0.0160 | 0.0242 | 0.2781 | N.A    | 0.0046 | 0.0280 | 0.0760 | 0.0177 | Kaempferol 3-O-rutinoside                                            | Flavonoid           |
| 595.130458 | 595.130708 | C <sub>26</sub> H <sub>28</sub> O <sub>16</sub> | -0.420 | 0.0106 | N.A    | 0.0189 | N.A    | N.A    | N.A    | N.A    | N.A    | Quercetin 3-vicianoside                                              | Flavonoid           |
| 595.166844 | 595.166960 | C <sub>27</sub> H <sub>32</sub> O <sub>15</sub> | -0.195 | 0.0086 | 0.0138 | 0.0525 | N.A    | 0.0073 | 0.0204 | N.A    | N.A    | Eriocitrin                                                           | Flavonoid glucoside |
| 607.109329 | 607.109419 | C <sub>30</sub> H <sub>24</sub> O <sub>14</sub> | -0.147 | 0.0115 | 0.0074 | 0.0188 | N.A    | 0.0055 | N.A    | N.A    | N.A    | Prodelphinidin A                                                     | Tannins             |
| 609.124979 | 609.125018 | C <sub>30</sub> H <sub>26</sub> O <sub>14</sub> | -0.064 | 0.0838 | 0.0143 | 0.0646 | N.A    | 0.0820 | 0.0128 | N.A    | N.A    | Prodelphinidin B                                                     | Tannins             |

|            |            |                                                 |        |        |        |        |        |        |        |        |        |                                           |                     |
|------------|------------|-------------------------------------------------|--------|--------|--------|--------|--------|--------|--------|--------|--------|-------------------------------------------|---------------------|
| 609.146108 | 609.146205 | C <sub>27</sub> H <sub>30</sub> O <sub>16</sub> | -0.159 | 0.0158 | 0.0141 | 4.8144 | 0.0144 | 0.0060 | 0.0219 | 0.5608 | N.A    | Rutin                                     | Flavonoid           |
| 623.161758 | 623.161783 | C <sub>28</sub> H <sub>32</sub> O <sub>16</sub> | -0.040 | 0.0124 | 0.0202 | N.A    | N.A    | 0.0084 | 0.0280 | 0.0173 | N.A    | Isorhamnetin-3-O-rutinoside               | Flavonoid           |
| 623.198144 | 623.198087 | C <sub>29</sub> H <sub>36</sub> O <sub>15</sub> | 0.092  | 0.0037 | 0.0183 | N.A    | N.A    | 0.0055 | 0.0316 | N.A    | N.A    | Verbascoside                              | Phenolic glycoside  |
| 625.141023 | 625.141258 | C <sub>27</sub> H <sub>30</sub> O <sub>17</sub> | -0.376 | 0.0094 | 0.0070 | 0.0415 | N.A    | 0.0071 | 0.0153 | N.A    | N.A    | Myricetin 3-O-rutinoside                  | Flavonoid           |
| 639.135544 | 639.135719 | C <sub>31</sub> H <sub>28</sub> O <sub>15</sub> | -0.274 | 0.0216 | N.A    | N.A    | N.A    | N.A    | N.A    | N.A    | N.A    | Quercetin 3-(6''-ferulylglucoside)        | Flavonoid           |
| 639.156673 | 639.156876 | C <sub>28</sub> H <sub>32</sub> O <sub>17</sub> | -0.318 | 0.0155 | 0.0220 | N.A    | N.A    | 0.0181 | 0.0251 | N.A    | 0.0788 | Laricitrin 3-rutinoside                   | Flavonoid           |
| 653.172323 | 653.172305 | C <sub>29</sub> H <sub>34</sub> O <sub>17</sub> | 0.028  | 0.0080 | N.A    | 0.0176 | N.A    | 0.0072 | N.A    | N.A    | N.A    | Syringetin 3-rutinoside                   | Flavonoid           |
| 665.214700 | 665.214582 | C <sub>24</sub> H <sub>42</sub> O <sub>21</sub> | -0.177 | 0.0218 | 0.0252 | 0.0279 | N.A    | 0.0019 | 0.0120 | 0.0027 | N.A    | Stachyose                                 | Carbohydrate        |
| 667.260744 | 667.260675 | C <sub>32</sub> H <sub>44</sub> O <sub>15</sub> | 0.104  | 0.0111 | 0.0184 | 0.0168 | N.A    | 0.0083 | N.A    | N.A    | N.A    | Junipercomnoside B                        | Flavonoid glucoside |
| 739.166844 | 739.166859 | C <sub>39</sub> H <sub>32</sub> O <sub>15</sub> | -0.020 | N.A    | N.A    | N.A    | N.A    | 0.0400 | 0.0444 | N.A    | N.A    | Kaempferol 3-(3,6-di-coumaroyl-glucoside) | Flavonoid glucoside |
| 755.204017 | 755.203999 | C <sub>33</sub> H <sub>40</sub> O <sub>20</sub> | 0.024  | N.A    | N.A    | 0.0065 | N.A    | N.A    | N.A    | N.A    | N.A    | Quercetin 3-rutinoside-7-rhamnoside       | Flavonoid           |
| 771.198932 | 771.198937 | C <sub>33</sub> H <sub>40</sub> O <sub>21</sub> | -0.006 | N.A    | N.A    | 0.0066 | N.A    | N.A    | N.A    | N.A    | N.A    | Kaempferol 3,7,4'-O-triglucoside          | Flavonoid           |
| 865.198538 | 865.199021 | C <sub>45</sub> H <sub>38</sub> O <sub>18</sub> | -0.559 | N.A    | 0.0554 | 0.0594 | N.A    | N.A    | N.A    | 0.0133 | N.A    | Procyanidin trimer C1                     | Tannins             |

**Table S2.** Compounds identified with (+) APPI from the conifer extracts

| Calculated <i>m/z</i> | Observed <i>m/z</i> | Elemental formula                              | Error (ppm) | Ion(s)*                                 | Relative Intensity (%) |               |                |              |             |               |                |              | Tentative compound(s)              | Class         |
|-----------------------|---------------------|------------------------------------------------|-------------|-----------------------------------------|------------------------|---------------|----------------|--------------|-------------|---------------|----------------|--------------|------------------------------------|---------------|
|                       |                     |                                                |             |                                         | Water                  |               |                |              | Ethanol     |               |                |              |                                    |               |
|                       |                     |                                                |             |                                         | <i>Pine</i>            | <i>Spruce</i> | <i>Juniper</i> | <i>Larch</i> | <i>Pine</i> | <i>Spruce</i> | <i>Juniper</i> | <i>Larch</i> |                                    |               |
| 111.044056            | 111.044032          | C <sub>6</sub> H <sub>6</sub> O <sub>2</sub>   | 0.215       | [M + H] <sup>++</sup> , M <sup>++</sup> | 0.0195                 | 0.0239        | 0.0088         | 0.0972       | N.A         | 0.0119        | 0.0106         | 0.0436       | Catechol                           | Phenol        |
| 123.044056            | 123.044049          | C <sub>7</sub> H <sub>6</sub> O <sub>2</sub>   | 0.053       | [M + H] <sup>++</sup> , M <sup>++</sup> | 0.0548                 | 0.1362        | 0.0404         | 0.0593       | 0.0116      | 0.0450        | 0.0659         | 0.0416       | Benzoic acid                       | Phenolic acid |
| 125.059706            | 125.059699          | C <sub>7</sub> H <sub>8</sub> O <sub>2</sub>   | 0.058       | [M + H] <sup>++</sup> , M <sup>++</sup> | 0.0450                 | 0.0451        | 0.0146         | 0.0509       | 0.0173      | 0.0191        | 0.0645         | 0.0451       | 4-Methylcatechol                   | Phenolics     |
| 127.038971            | 127.038964          | C <sub>6</sub> H <sub>6</sub> O <sub>3</sub>   | 0.049       | [M + H] <sup>++</sup> , M <sup>++</sup> | 0.1371                 | 0.0821        | 0.0912         | 0.2023       | 0.0205      | 0.0460        | 0.0412         | 0.0738       | Pyrogallol                         | Phenol        |
| 135.080441            | 135.080427          | C <sub>9</sub> H <sub>10</sub> O               | 0.109       | [M + H] <sup>++</sup> , M <sup>++</sup> | 0.0133                 | 0.0587        | 0.0080         | 0.0497       | 0.0057      | 0.0157        | 0.0163         | 0.0189       | Cinnamyl alcohol                   | Phenol        |
| 135.116827            | 135.116816          | C <sub>10</sub> H <sub>14</sub>                | 0.084       | [M + H] <sup>++</sup> , M <sup>++</sup> | 0.0373                 | 0.0160        | 0.0132         | 0.0137       | 0.0366      | 0.0379        | 0.0291         | 0.0228       | Verbenene                          | Terpenoid     |
| 137.059706            | 137.059699          | C <sub>8</sub> H <sub>8</sub> O <sub>2</sub>   | 0.054       | [M + H] <sup>++</sup> , M <sup>++</sup> | 0.1055                 | 0.7745        | 0.0484         | 0.0435       | 0.0297      | 0.7503        | 0.0615         | 0.0288       | Piceol                             | Phenolics     |
| 137.132477            | 137.132465          | C <sub>10</sub> H <sub>16</sub>                | 0.084       | [M + H] <sup>++</sup> , M <sup>++</sup> | 0.0177                 | 0.0099        | 0.0099         | 0.0202       | 0.0359      | 0.0824        | 0.0344         | 0.0192       | Monoterpene                        | Terpenoid     |
| 138.127726            | 138.127699          | C <sub>9</sub> H <sub>15</sub> N               | 0.192       | [M + H] <sup>+</sup>                    | N.A                    | 0.0042        | N.A            | N.A          | N.A         | N.A           | N.A            | N.A          | 1,6 hydropinidine                  | alkaloids     |
| 139.038971            | 139.038970          | C <sub>7</sub> H <sub>6</sub> O <sub>3</sub>   | 0.005       | [M + H] <sup>++</sup> , M <sup>++</sup> | 0.1859                 | 0.2130        | 0.0819         | 0.4905       | 0.0289      | 0.2739        | 0.0505         | 0.1594       | Salicylic acid                     | Phenolic acid |
| 139.075356            | 139.075340          | C <sub>8</sub> H <sub>10</sub> O <sub>2</sub>  | 0.117       | [M + H] <sup>++</sup> , M <sup>++</sup> | 1.0657                 | 0.2786        | N.A            | 0.3157       | N.A         | N.A           | N.A            | N.A          | Tyrosol                            | Phenolics     |
| 139.135551            | 139.135536          | C <sub>9</sub> H <sub>16</sub> N               | 0.108       | [M + H] <sup>+</sup>                    | N.A                    | 0.0043        | N.A            | N.A          | N.A         | N.A           | N.A            | N.A          | Pinidine                           | Alkaloids     |
| 147.044056            | 147.044047          | C <sub>9</sub> H <sub>6</sub> O <sub>2</sub>   | 0.059       | [M + H] <sup>++</sup> , M <sup>++</sup> | 0.0648                 | 0.0667        | 0.0255         | 0.0537       | 0.0230      | 0.2722        | 0.0269         | 0.0379       | Coumarin                           | Phenolic acid |
| 149.059706            | 149.059717          | C <sub>9</sub> H <sub>8</sub> O <sub>2</sub>   | -0.073      | [M + H] <sup>++</sup> , M <sup>++</sup> | 0.0427                 | 0.0569        | 0.0222         | N.A          | 0.0136      | 0.0744        | 0.0267         | 0.0215       | Cinnamic acid                      | Organic acid  |
| 151.075356            | 151.075381          | C <sub>9</sub> H <sub>10</sub> O <sub>2</sub>  | -0.163      | [M + H] <sup>++</sup> , M <sup>++</sup> | N.A                    | N.A           | 0.0251         | N.A          | N.A         | N.A           | N.A            | N.A          | 4-hydroxycinnamyl alcohol          | Phenolics     |
| 151.111742            | 151.111744          | C <sub>10</sub> H <sub>14</sub> O              | -0.017      | [M + H] <sup>++</sup> , M <sup>++</sup> | 0.0369                 | 0.0205        | 0.0140         | 0.0150       | N.A         | 0.0413        | 0.0241         | 0.0192       | Thymol                             | Terpenoid     |
| 153.054621            | 153.054630          | C <sub>8</sub> H <sub>8</sub> O <sub>3</sub>   | -0.062      | [M + H] <sup>++</sup> , M <sup>++</sup> | 0.2729                 | 0.2641        | 0.0574         | 0.2139       | 0.0415      | 0.6544        | 0.0508         | 0.0728       | Vanillin                           | Organic acid  |
| 153.127392            | 153.127404          | C <sub>10</sub> H <sub>16</sub> O              | -0.080      | [M + H] <sup>++</sup> , M <sup>++</sup> | 0.0854                 | 0.0250        | 0.0145         | 0.0176       | 0.0215      | 0.0646        | 0.0324         | 0.0181       | Methyl thymol, Thujone, Piperitone | Terpenoid     |
| 154.122641            | 154.122638          | C <sub>9</sub> H <sub>15</sub> N O             | 0.018       | [M + H] <sup>+</sup>                    | N.A                    | 0.0159        | N.A            | N.A          | N.A         | N.A           | N.A            | N.A          | 1,6-dehydropinidinone              | Alkaloid      |
| 155.033885            | 155.033901          | C <sub>7</sub> H <sub>6</sub> O <sub>4</sub>   | -0.101      | [M + H] <sup>++</sup> , M <sup>++</sup> | 0.1168                 | 0.0271        | 0.0267         | 0.1072       | 0.0115      | 0.0483        | 0.0180         | 0.0353       | Protocatechuic acid                | Phenolic acid |
| 155.070271            | 155.070266          | C <sub>9</sub> H <sub>10</sub> O <sub>3</sub>  | 0.029       | [M + H] <sup>++</sup> , M <sup>++</sup> | 0.0416                 | 0.0088        | 0.0143         | 0.0211       | 0.0175      | 0.0540        | 0.0375         | 0.0237       | Sylvopinol, Hydroxytyrosol         | Phenolics     |
| 156.138291            | 156.138281          | C <sub>9</sub> H <sub>17</sub> N O             | 0.062       | [M + H] <sup>+</sup>                    | N.A                    | 0.0259        | N.A            | N.A          | N.A         | N.A           | N.A            | N.A          | epipinidinone                      | alkaloids     |
| 159.137956            | 159.137965          | C <sub>9</sub> H <sub>18</sub> O <sub>2</sub>  | -0.051      | [M + H] <sup>+</sup>                    | N.A                    | N.A           | N.A            | N.A          | N.A         | 0.0031        | 0.0117         | N.A          | Nonanoic acid                      | Fatty acid    |
| 163.038971            | 163.038963          | C <sub>9</sub> H <sub>6</sub> O <sub>3</sub>   | 0.047       | [M + H] <sup>++</sup> , M <sup>++</sup> | 0.0170                 | 0.1002        | 0.0579         | 0.0440       | 0.0106      | 0.1523        | N.A            | 0.0233       | Hydroxycinnamate                   | Phenolic acid |
| 163.075356            | 163.075352          | C <sub>10</sub> H <sub>10</sub> O <sub>2</sub> | 0.022       | [M + H] <sup>++</sup> , M <sup>++</sup> | 0.1266                 | 0.0543        | 0.1583         | 0.0275       | 0.1218      | 0.3656        | 0.1254         | 0.0215       | Safrole, Methyl cinnamate          | Phenolic acid |
| 164.046796            | 164.046810          | C <sub>9</sub> H <sub>8</sub> O <sub>3</sub>   | -0.087      | [M + H] <sup>+</sup> , M <sup>+++</sup> | 0.1461                 | 0.1906        | 0.0384         | 0.1027       | 0.0161      | 0.3634        | 0.0285         | 0.0511       | p-coumaric acid                    | Phenolic acid |

|            |            |                                                 |        |                                         |        |        |        |        |        |        |        |        |                                              |               |
|------------|------------|-------------------------------------------------|--------|-----------------------------------------|--------|--------|--------|--------|--------|--------|--------|--------|----------------------------------------------|---------------|
| 165.091006 | 165.091009 | C <sub>10</sub> H <sub>12</sub> O <sub>2</sub>  | -0.018 | [M + H] <sup>++</sup> , M <sup>++</sup> | 0.0494 | 0.0200 | 0.0224 | 0.0221 | 0.0320 | 0.1220 | 0.0389 | 0.0152 | 2-phenyl ethyl acetate, Eugenol              | Terpenoid     |
| 165.127392 | 165.127399 | C <sub>11</sub> H <sub>16</sub> O               | -0.044 | [M + H] <sup>++</sup> , M <sup>++</sup> | 0.0102 | 0.0062 | 0.0047 | 0.0112 | 0.0109 | 0.0224 | N.A    | 0.0163 | Thymol methyl ether                          | Terpenoid     |
| 167.070271 | 167.070285 | C <sub>9</sub> H <sub>10</sub> O <sub>3</sub>   | -0.087 | [M + H] <sup>+</sup> , M <sup>+</sup>   | 0.0323 | 0.0180 | 0.0243 | 0.0158 | 0.0130 | 0.0907 | 0.0287 | 0.0234 | 3-Hydroxyphenylpropionic acid                | Phenolic acid |
| 167.106656 | 167.106663 | C <sub>10</sub> H <sub>14</sub> O <sub>2</sub>  | -0.044 | [M + H] <sup>++</sup> , M <sup>++</sup> | 0.0391 | 0.0189 | 0.0210 | 0.0241 | 0.0227 | 0.0662 | 0.0395 | 0.0177 | Perillic acid                                | Organic acid  |
| 169.049535 | 169.049540 | C <sub>8</sub> H <sub>8</sub> O <sub>4</sub>    | -0.028 | [M + H] <sup>++</sup> , M <sup>++</sup> | 0.0630 | 0.0111 | 0.0270 | 0.0270 | 0.0201 | 0.0869 | 0.0258 | 0.0104 | Vanillic acid                                | Phenolic acid |
| 169.122306 | 169.122322 | C <sub>10</sub> H <sub>16</sub> O <sub>2</sub>  | -0.094 | [M + H] <sup>++</sup> , M <sup>++</sup> | 0.0466 | 0.0151 | 0.0118 | 0.0172 | 0.0164 | 0.0397 | 0.0305 | 0.0143 | Ascaridole                                   | Terpenoid     |
| 171.028800 | 171.028808 | C <sub>7</sub> H <sub>6</sub> O <sub>5</sub>    | -0.049 | [M + H] <sup>++</sup> , M <sup>++</sup> | 0.0190 | 0.0046 | 0.0042 | 0.0172 | 0.0045 | 0.0095 |        | 0.0130 | Gallic acid                                  | Phenolic acid |
| 173.044450 | 173.044454 | C <sub>7</sub> H <sub>8</sub> O <sub>5</sub>    | -0.026 | [M + H] <sup>++</sup> , M <sup>++</sup> | 0.0288 | 0.0102 | 0.0127 | 0.0301 | 0.0052 | 0.0138 | 0.0056 | 0.0075 | Dehydroshikimic acid                         | Terpenoid     |
| 175.060100 | 175.060118 | C <sub>7</sub> H <sub>10</sub> O <sub>5</sub>   | -0.099 | [M + H] <sup>++</sup> , M <sup>++</sup> | 0.0148 | 0.0036 | N.A    | N.A    | N.A    | N.A    | N.A    | N.A    | Shikimic acid                                | Cyclitol      |
| 176.070605 | 176.070600 | C <sub>10</sub> H <sub>9</sub> N O <sub>2</sub> | 0.028  | M <sup>+++</sup>                        | 0.0069 | N.A    | N.A    | N.A    | N.A    | N.A    | N.A    | N.A    | Indoleacetic acid                            | Indole        |
| 179.033885 | 179.033892 | C <sub>9</sub> H <sub>6</sub> O <sub>4</sub>    | -0.041 | [M + H] <sup>++</sup> , M <sup>++</sup> | 0.0421 | 0.0180 | 0.0291 | 0.0512 | 0.0148 | 0.0413 | 0.0099 | 0.0224 | Aesculetin                                   | Phenolics     |
| 179.070271 | 179.070269 | C <sub>10</sub> H <sub>10</sub> O <sub>3</sub>  | 0.010  | [M + H] <sup>++</sup> , M <sup>++</sup> | 0.0469 | 0.0544 | 0.0496 | 0.0249 | 0.0539 | 0.2560 | 0.0413 | 0.0141 | Dehydroconiferyl alcohol                     | Phenolics     |
| 179.106656 | 179.106668 | C <sub>11</sub> H <sub>14</sub> O <sub>2</sub>  | -0.067 | [M + H] <sup>++</sup> , M <sup>++</sup> | 0.0169 | 0.0101 | 0.0125 | 0.0122 | 0.0196 | 0.0301 | 0.0351 | 0.0141 | Methyl eugenol                               | Terpenoid     |
| 180.078096 | 180.078102 | C <sub>10</sub> H <sub>12</sub> O <sub>3</sub>  | -0.033 | [M + H] <sup>+</sup> , M <sup>+++</sup> | 0.0944 | 0.1060 | 0.2225 | 0.0225 | 0.0646 | 0.2816 | 0.0891 | 0.0252 | Coniferyl alcohol                            | Phenolics     |
| 181.049535 | 181.049556 | C <sub>9</sub> H <sub>8</sub> O <sub>4</sub>    | -0.117 | [M + H] <sup>++</sup> , M <sup>++</sup> | 0.0294 | 0.0164 | 0.0276 | 0.0204 | 0.0082 | 0.0421 | 0.0178 | 0.0059 | Caffeic acid                                 | Phenolic acid |
| 181.101177 | 181.101189 | C <sub>14</sub> H <sub>12</sub>                 | -0.070 | [M + H] <sup>++</sup> , M <sup>++</sup> | 0.0366 | 0.1120 | N.A    | 0.1638 | N.A    | N.A    | N.A    | N.A    | Stilbenes                                    | Stilbenoid    |
| 182.093746 | 182.093747 | C <sub>10</sub> H <sub>14</sub> O <sub>3</sub>  | -0.007 | [M + H] <sup>+</sup> , M <sup>+++</sup> | 0.1021 | 0.3079 | 0.0228 | 0.0288 | 0.0343 | 0.3640 | 0.0148 | 0.0104 | Dihydroconiferyl alcohol                     | Phenolics     |
| 183.065185 | 183.065191 | C <sub>9</sub> H <sub>10</sub> O <sub>4</sub>   | -0.032 | [M + H] <sup>++</sup> , M <sup>++</sup> | 0.0248 | N.A    | 0.0189 | N.A    | 0.0268 | 0.0550 | 0.0229 | 0.0112 | 3-Hydroxy-3-(3-hydroxyphenyl) propionic acid | Phenolic acid |
| 183.137956 | 183.137977 | C <sub>11</sub> H <sub>18</sub> O <sub>2</sub>  | -0.114 | [M + H] <sup>++</sup> , M <sup>++</sup> | 0.0100 | 0.0048 | 0.0041 | 0.0110 | 0.0080 | 0.0195 | 0.0247 | 0.0163 | Terpinyl formate                             | Terpenoid     |
| 185.044450 | 185.044468 | C <sub>8</sub> H <sub>8</sub> O <sub>5</sub>    | -0.101 | [M + H] <sup>++</sup> , M <sup>++</sup> | 0.0096 | 0.0033 | 0.0053 | 0.0054 | 0.0058 | 0.0143 | 0.0000 | 0.0073 | 4-O-Methylgallic acid                        | Phenolic acid |
| 185.153606 | 185.153616 | C <sub>11</sub> H <sub>20</sub> O <sub>2</sub>  | -0.052 | [M + H] <sup>+</sup>                    | 0.0127 | 0.0066 | 0.0042 | 0.0128 | 0.0092 | 0.0136 | 0.0426 | 0.0220 | Methyl citronellate, z-3-Hexenyl-isovalerate | Terpenoid     |
| 193.085921 | 193.085944 | C <sub>11</sub> H <sub>12</sub> O <sub>3</sub>  | -0.122 | [M + H] <sup>+</sup> , M <sup>+++</sup> | 0.0459 | 0.0175 | 0.0423 | 0.0232 | 0.0269 | 0.0678 | 0.0436 | 0.0107 | p-Coumaric acid ethyl ester                  | Phenolic acid |
| 194.057360 | 194.057384 | C <sub>10</sub> H <sub>10</sub> O <sub>4</sub>  | -0.123 | [M + H] <sup>+</sup> , M <sup>+++</sup> | 0.1046 | 0.0937 | 0.1663 | 0.0842 | 0.0217 | 0.1497 | 0.0341 | 0.0300 | Ferulic acid                                 | Phenolic acid |
| 195.137956 | 195.137957 | C <sub>12</sub> H <sub>18</sub> O <sub>2</sub>  | -0.006 | [M + H] <sup>++</sup> , M <sup>++</sup> | 0.0216 | 0.0072 | 0.0073 | 0.0094 | 0.0295 | 0.0294 | 0.0300 | 0.0153 | Cis-carvyl acetate, Myrtenyl                 | Terpenoid     |
| 197.153606 | 197.153621 | C <sub>12</sub> H <sub>20</sub> O <sub>2</sub>  | -0.072 | [M + H] <sup>++</sup> , M <sup>++</sup> | 0.0101 | 0.0044 | 0.0035 | 0.0096 | 0.0088 | 0.0106 | 0.0278 | 0.0176 | Terpinyl acetate, Bornyl acetate             | Terpenoid     |
| 199.060100 | 199.060109 | C <sub>9</sub> H <sub>10</sub> O <sub>5</sub>   | -0.048 | [M + H] <sup>++</sup> , M <sup>++</sup> | 0.0111 | 0.0028 | 0.0060 | 0.0057 | 0.0055 | 0.0108 | 0.0064 | N.A    | Syringic acid                                | Phenolic acid |
| 201.184906 | 201.184927 | C <sub>12</sub> H <sub>24</sub> O <sub>2</sub>  | -0.103 | [M + H] <sup>+</sup>                    | N.A    | N.A    | N.A    | N.A    | N.A    | N.A    | 0.0107 | N.A    | Lauric acid                                  | Fatty acid    |
| 204.187252 | 204.187251 | C <sub>15</sub> H <sub>24</sub>                 | 0.008  | [M + H] <sup>+</sup> , M <sup>+++</sup> | 0.0230 | 0.0059 | 0.0026 | 0.0059 | 0.6991 | 0.4385 | 0.2227 | 0.1236 | Sesquiterpene                                | Terpenoid     |
| 207.101571 | 207.101571 | C <sub>12</sub> H <sub>14</sub> O <sub>3</sub>  | -0.001 | [M + H] <sup>++</sup> , M <sup>++</sup> | 0.0336 | 0.0235 | 0.0250 | 0.0200 | 0.0253 | 0.0578 | 0.0439 | 0.0102 | Acetyl eugenol                               | Terpenoid     |
| 207.137956 | 207.137969 | C <sub>13</sub> H <sub>18</sub> O <sub>2</sub>  | -0.059 | [M + H] <sup>++</sup> , M <sup>++</sup> | 0.0898 | 0.0324 | 0.1056 | 0.0203 | 0.0830 | 0.1425 | 0.0772 | 0.0238 | Phenyl ethyl-3-methyl butanote               | Terpenoid     |
| 207.174342 | 207.174314 | C <sub>14</sub> H <sub>22</sub> O               | 0.135  | [M + H] <sup>++</sup> , M <sup>++</sup> | 0.0102 | 0.0054 | N.A    | N.A    | 0.0468 | 0.0222 | 0.0286 | 0.0156 | Alpha irone                                  | Terpenoid     |

|            |            |                                                |        |                                         |        |        |        |        |         |        |        |        |                                                                  |               |
|------------|------------|------------------------------------------------|--------|-----------------------------------------|--------|--------|--------|--------|---------|--------|--------|--------|------------------------------------------------------------------|---------------|
| 211.096485 | 211.096444 | C <sub>11</sub> H <sub>14</sub> O <sub>4</sub> | 0.197  | [M + H] <sup>++</sup> , M <sup>++</sup> | 0.0109 | 0.0037 | 0.0106 | 0.0054 | 0.0078  | 0.0115 | 0.0180 | 0.0064 | Sinapyl alcohol                                                  | Phenolics     |
| 211.169256 | 211.169234 | C <sub>13</sub> H <sub>22</sub> O <sub>2</sub> | 0.109  | [M + H] <sup>++</sup> , M <sup>++</sup> | 0.0191 | 0.0094 | 0.0070 | 0.0081 | 0.0136  | 0.0167 | 0.0330 | 0.0174 | Isobornyl propionate, 3-methyl butanoic acid, 2- methyl butyrate | Terpenoid     |
| 213.091006 | 213.091015 | C <sub>14</sub> H <sub>12</sub> O <sub>2</sub> | -0.041 | [M + H] <sup>++</sup> , M <sup>++</sup> | 0.0368 | 0.0206 | 0.0084 | 0.0262 | 0.0368  | 0.0192 | 0.0309 | 0.0301 | Pinosylvin                                                       | Stilbenoid    |
| 217.158692 | 217.158684 | C <sub>15</sub> H <sub>20</sub> O              | 0.034  | [M + H] <sup>++</sup> , M <sup>++</sup> | 0.0181 | 0.0059 | 0.0074 | 0.0063 | 0.0267  | 0.0251 | 0.0263 | 0.0155 | Hexyl cinnamaldehyde                                             |               |
| 219.174342 | 219.174320 | C <sub>15</sub> H <sub>22</sub> O              | 0.099  | [M + H] <sup>++</sup> , M <sup>++</sup> | 0.0459 | 0.0089 | 0.0213 | 0.0077 | 0.0805  | 0.0503 | 0.0420 | 0.0147 | Nootkatone                                                       | Terpenoid     |
| 221.189992 | 221.189972 | C <sub>15</sub> H <sub>24</sub> O              | 0.088  | [M + H] <sup>++</sup> , M <sup>++</sup> | 0.0803 | 0.0196 | 0.0178 | 0.0102 | 0.1130  | 0.1213 | 0.0467 | 0.0164 | Epi cubenol, caryophyllene oxide                                 | Terpenoid     |
| 223.205642 | 223.205631 | C <sub>15</sub> H <sub>26</sub> O              | 0.050  | [M + H] <sup>++</sup> , M <sup>++</sup> | 0.0108 | 0.0040 | 0.0032 | 0.0080 | 0.0086  | 0.0096 | 0.0318 | 0.0149 | Cadinol, fersonal, nerolidol                                     | Terpenoid     |
| 225.075750 | 225.075740 | C <sub>11</sub> H <sub>12</sub> O <sub>5</sub> | 0.043  | [M + H] <sup>++</sup> , M <sup>++</sup> | 0.0168 | 0.0060 | N.A    | 0.0046 | N.A     | N.A    | N.A    | N.A    | Sinapinic acid                                                   | Phenolic acid |
| 227.091400 | 227.091409 | C <sub>11</sub> H <sub>14</sub> O <sub>5</sub> | -0.040 | [M + H] <sup>++</sup> , M <sup>++</sup> | 0.0139 | 0.0101 | 0.0110 | N.A    | 0.0086  | 0.0170 | 0.0078 | 0.0075 | Dihydrosinapic acid                                              | Phenolic acid |
| 227.106656 | 227.106638 | C <sub>15</sub> H <sub>14</sub> O <sub>2</sub> | 0.079  | [M + H] <sup>++</sup> , M <sup>++</sup> | 0.0222 | 0.0167 | 0.0097 | 0.0079 | 0.0603  | 0.0184 | 0.0179 | 0.0121 | Pinosylvin monomethyl ether                                      | Stilbenoid    |
| 229.085921 | 229.085900 | C <sub>14</sub> H <sub>12</sub> O <sub>3</sub> | 0.093  | [M + H] <sup>++</sup> , M <sup>++</sup> | 0.0584 | 0.0257 | 0.0148 | 0.0188 | 0.0699  | 0.1834 | 0.0137 | 0.0123 | Resveratrol                                                      | Stilbenoid    |
| 229.216207 | 229.216201 | C <sub>14</sub> H <sub>28</sub> O <sub>2</sub> | 0.023  | [M + H] <sup>+</sup>                    | 0.0072 | N.A    | 0.0027 | N.A    | 0.0053  | 0.0066 | 0.0469 | 0.0150 | Myristic acid                                                    | Fatty acid    |
| 231.101571 | 231.101553 | C <sub>14</sub> H <sub>14</sub> O <sub>3</sub> | 0.078  | [M + H] <sup>++</sup> , M <sup>++</sup> | 0.0361 | 0.0199 | 0.0141 | 0.0767 | 0.0215  | 0.0151 | 0.0242 | 0.0455 | Dihydro-resveratrol                                              | Stilbenoid    |
| 244.073010 | 244.072979 | C <sub>14</sub> H <sub>12</sub> O <sub>4</sub> | 0.129  | [M + H] <sup>+</sup> , M <sup>+++</sup> | 0.0315 | 1.3089 | 0.0306 | 0.0207 | 0.0094  | 3.6935 | 0.0217 | 0.0161 | Piceatannol                                                      | Stilbenoid    |
| 247.096485 | 247.096466 | C <sub>14</sub> H <sub>14</sub> O <sub>4</sub> | 0.077  | [M + H] <sup>+</sup> , M <sup>++</sup>  | 0.0396 | 0.0252 | 0.0294 | 0.0967 | 0.0211  | 0.0190 | 0.0165 | 0.0239 | Dihydropicatannol                                                | Stilbenoid    |
| 253.195077 | 253.195065 | C <sub>19</sub> H <sub>24</sub>                | 0.050  | [M + H] <sup>+</sup>                    | 0.0114 | 0.0117 | 0.0068 | 0.0063 | 0.1043  | 0.1917 | 0.1397 | 0.0746 | 18-Norabieta-4,6,8,11,13-pentaene, Simonellite                   | Terpenoid     |
| 255.231857 | 255.231832 | C <sub>16</sub> H <sub>30</sub> O <sub>2</sub> | 0.097  | [M + H] <sup>+</sup>                    | 0.0590 | 0.0185 | 0.0242 | 0.0367 | 0.0217  | 0.0465 | 0.2132 | 0.1123 | Palmitoleic acid                                                 | Fatty acid    |
| 257.080835 | 257.080820 | C <sub>15</sub> H <sub>12</sub> O <sub>4</sub> | 0.059  | [M + H] <sup>++</sup> , M <sup>++</sup> | 0.0246 | 0.0571 | 0.0199 | 0.0047 | 0.0138  | 0.0685 | 0.0119 | 0.0079 | Pinocembrin                                                      | Flavanone     |
| 257.226377 | 257.226382 | C <sub>19</sub> H <sub>28</sub>                | -0.019 | [M + H] <sup>++</sup> , M <sup>++</sup> | 0.0216 | 0.0202 | 0.0335 | 0.0122 | 1.5266  | 0.4463 | 2.4721 | 0.1427 | Norabietatriene                                                  | Terpenoid     |
| 257.247507 | 257.247495 | C <sub>16</sub> H <sub>32</sub> O <sub>2</sub> | 0.047  | [M + H] <sup>+</sup>                    | 0.1676 | 0.0141 | 0.0762 | 0.0133 | 0.0468  | 0.0757 | 1.2191 | 0.1715 | Palmitic acid                                                    | Fatty acid    |
| 258.088660 | 258.088639 | C <sub>15</sub> H <sub>14</sub> O <sub>4</sub> | 0.083  | [M + H] <sup>+</sup> , M <sup>+++</sup> | 0.0287 | 2.9650 | 0.0173 | 0.0134 | 0.0086  | 3.6121 | 0.0085 | 0.0121 | Isorhapontigenin                                                 | Stilbenoid    |
| 271.060100 | 271.060087 | C <sub>15</sub> H <sub>10</sub> O <sub>5</sub> | 0.047  | [M + H] <sup>++</sup> , M <sup>++</sup> | 0.0669 | 0.1146 | 0.3315 | 0.5627 | 0.1118  | 0.3531 | 0.1380 | 0.5279 | Apigenin                                                         | Flavone       |
| 271.205642 | 271.205626 | C <sub>19</sub> H <sub>26</sub> O              | 0.059  | [M + H] <sup>++</sup> , M <sup>++</sup> | 0.0321 | 0.0413 | 0.0340 | 0.0182 | 0.2968  | 0.4406 | 0.5382 | 0.2772 | 7-Oxo-19-norabieta-8,11,13-triene, Nordehydroabietal             | Terpenoid     |
| 271.242027 | 271.242011 | C <sub>20</sub> H <sub>30</sub>                | 0.061  | [M + H] <sup>++</sup> , M <sup>++</sup> | 0.0115 | 0.0119 | 0.0119 | 0.0104 | 0.5509  | 0.4121 | 0.3513 | 0.1524 | Abieta-8,11,13-triene, Dehydroabietane                           | Terpenoid     |
| 273.075750 | 273.075751 | C <sub>15</sub> H <sub>12</sub> O <sub>5</sub> | -0.003 | [M + H] <sup>++</sup> , M <sup>++</sup> | 0.0796 | 0.0743 | 0.3987 | 0.0697 | 0.1115  | 0.2060 | 0.2559 | 0.0560 | Naringenin                                                       | Flavanone     |
| 273.096879 | 273.096864 | C <sub>12</sub> H <sub>16</sub> O <sub>7</sub> | 0.058  | [M + H] <sup>++</sup> , M <sup>++</sup> | 0.0140 | N.A    | 0.0132 | N.A    | N.A     | N.A    | N.A    | N.A    | Arbutin                                                          | Glucoside     |
| 273.257677 | 273.257665 | C <sub>20</sub> H <sub>32</sub>                | 0.047  | [M + H] <sup>++</sup> , M <sup>++</sup> | 0.0241 | 0.0166 | 0.0087 | 0.0141 | 15.2740 | 0.4366 | 0.2054 | 0.1109 | Diterpene                                                        | Terpenoid     |
| 275.091400 | 275.091406 | C <sub>15</sub> H <sub>14</sub> O <sub>5</sub> | -0.023 | [M + H] <sup>++</sup> , M <sup>++</sup> | 0.0382 | 0.0293 | 0.0935 | 0.0226 | 0.0155  | 0.0885 | 0.0713 | 0.0886 | Epiafzelechin                                                    | Flavan-3-ol   |
| 279.231857 | 279.231850 | C <sub>18</sub> H <sub>30</sub> O <sub>2</sub> | 0.024  | [M + H] <sup>++</sup> , M <sup>++</sup> | 0.0425 | 0.0427 | 0.0403 | 0.1008 | 0.1394  | 0.1765 | 0.5524 | 0.3758 | Pinolenic, linolenic                                             | Fatty acid    |
| 281.247507 | 281.247459 | C <sub>18</sub> H <sub>32</sub> O <sub>2</sub> | 0.172  | [M + H] <sup>++</sup> , M <sup>++</sup> | 0.0457 | 0.0318 | 0.0387 | 0.0930 | 0.0181  | 0.0571 | 0.3837 | 0.2704 | Linoleic acid                                                    | Fatty acid    |

|            |            |                                                |        |                                         |        |        |         |         |         |        |         |         |                                              |                    |
|------------|------------|------------------------------------------------|--------|-----------------------------------------|--------|--------|---------|---------|---------|--------|---------|---------|----------------------------------------------|--------------------|
| 283.263157 | 283.263167 | C <sub>18</sub> H <sub>34</sub> O <sub>2</sub> | -0.037 | [M + H] <sup>++</sup> , M <sup>**</sup> | 0.0876 | 0.0634 | 0.0511  | 0.1159  | 0.0273  | 0.0579 | 0.7193  | 0.4546  | Oleic acid                                   | Fatty acid         |
| 285.221292 | 285.221278 | C <sub>20</sub> H <sub>28</sub> O              | 0.049  | [M + H] <sup>++</sup> , M <sup>**</sup> | 0.0271 | 0.0205 | 0.0521  | 0.0167  | 0.9460  | 0.3975 | 1.5544  | 0.1239  | Dehydroabietal, Dehydroferruginol            | Terpenoid          |
| 285.278807 | 285.278785 | C <sub>18</sub> H <sub>36</sub> O <sub>2</sub> | 0.077  | [M + H] <sup>+</sup>                    | 0.3233 | 0.0395 | 0.2132  | 0.0469  | 0.1392  | 0.1706 | 4.2272  | 0.4553  | Stearic acid                                 | Fatty acid         |
| 286.047189 | 286.047202 | C <sub>15</sub> H <sub>10</sub> O <sub>6</sub> | -0.045 | [M + H] <sup>+</sup> , M <sup>***</sup> | 1.1019 | 0.8147 | 1.1934  | 23.1397 | 0.8661  | 2.9902 | 0.2991  | 32.8414 | Kaempferol                                   | Flavonol           |
| 286.083575 | 286.083573 | C <sub>16</sub> H <sub>14</sub> O <sub>5</sub> | 0.007  | [M + H] <sup>+</sup> , M <sup>***</sup> | 0.0883 | 0.1767 | 0.1449  | 0.0765  | 0.0326  | 0.1584 | 0.0445  | 0.0619  | Dihydrobiochanin A                           | Flavanone          |
| 287.127786 | 287.127775 | C <sub>17</sub> H <sub>18</sub> O <sub>4</sub> | 0.038  | [M + H] <sup>++</sup> , M <sup>**</sup> | 0.1163 | 0.1633 | 0.0696  | 0.0476  | 0.0622  | 0.1506 | 0.0787  | 0.0461  | 4'-Hydroxy-3,4,5-trimethoxystilbene          | Stilbenoid         |
| 287.236942 | 287.236963 | C <sub>20</sub> H <sub>30</sub> O              | -0.074 | [M + H] <sup>++</sup> , M <sup>**</sup> | 0.0313 | 0.0197 | 0.0341  | 0.0186  | 0.7952  | 0.2677 | 0.9376  | 0.0830  | Ferruginol                                   | Terpenoid          |
| 288.062840 | 288.062866 | C <sub>15</sub> H <sub>12</sub> O <sub>6</sub> | -0.091 | [M + H] <sup>+</sup> , M <sup>***</sup> | 0.4386 | 1.8695 | 1.6528  | 2.4474  | 0.2005  | 1.6308 | 0.1416  | 1.3157  | Aromadendrin                                 | Flavanonol         |
| 289.252592 | 289.252610 | C <sub>20</sub> H <sub>32</sub> O              | -0.062 | [M + H] <sup>++</sup> , M <sup>**</sup> | 0.0215 | 0.0217 | 0.0378  | 0.0279  | 0.4620  | 0.2369 | 0.4396  | 0.0800  | Isopimarol, Abietol                          | Terpenoid          |
| 290.078490 | 290.078480 | C <sub>15</sub> H <sub>14</sub> O <sub>6</sub> | 0.033  | [M + H] <sup>+</sup> , M <sup>***</sup> | 1.8804 | 6.9504 | 17.8318 | 8.8678  | 0.9928  | 4.8593 | 4.7457  | 3.7962  | Catechin                                     | Flavan-3-ol        |
| 291.231857 | 291.231880 | C <sub>19</sub> H <sub>30</sub> O <sub>2</sub> | -0.081 | [M + H] <sup>+</sup>                    | 0.0544 | 0.0283 | 0.0367  | 0.0492  | 2.3862  | 0.0526 | 0.2300  | 0.0980  | 19- Noragathic acid                          | Terpenoid          |
| 291.268242 | 291.268253 | C <sub>20</sub> H <sub>34</sub> O              | -0.035 | [M + H] <sup>++</sup> , M <sup>**</sup> | 0.0242 | 0.0365 | 0.0333  | 0.0627  | 0.1170  | 0.0426 | 0.1349  | 0.0950  | Isoabienal, Anticopalol                      | Terpenoid          |
| 292.239682 | 292.239687 | C <sub>19</sub> H <sub>32</sub> O <sub>2</sub> | -0.019 | M <sup>***</sup>                        | N.A    | N.A    | N.A     | 0.0107  |         | 0.0218 | 0.0979  | 0.0501  | Pinolenic methyl ester, 15-norpinifolic acid | Terpenoid          |
| 293.247507 | 293.247509 | C <sub>19</sub> H <sub>32</sub> O <sub>2</sub> | -0.007 | [M + H] <sup>+</sup>                    | 0.0184 | 0.0185 | 0.0230  | 0.0611  | 0.0000  | 0.0644 | 0.2779  | 0.1056  | Pinolenic methyl ester, 15-norpinifolic acid | Terpenoid          |
| 297.315192 | 297.315179 | C <sub>20</sub> H <sub>40</sub> O              | 0.042  | [M + H] <sup>+</sup>                    | 0.0065 | 0.0033 | 0.0039  | 0.0118  | N.A     | N.A    | 0.0648  | N.A     | Phytol                                       | Terpenoid          |
| 299.112529 | 299.112497 | C <sub>14</sub> H <sub>18</sub> O <sub>7</sub> | 0.107  | [M + H] <sup>++</sup> , M <sup>**</sup> | 0.0186 | 0.0091 | 0.0192  | 0.0109  | 0.0073  | 0.0438 | 0.0138  |         | Picein                                       | Phenolic glycoside |
| 299.127786 | 299.127808 | C <sub>18</sub> H <sub>18</sub> O <sub>4</sub> | -0.075 | [M + H] <sup>++</sup> , M <sup>**</sup> | 2.2970 | 0.5073 | 0.7610  | 0.1203  | 1.9429  | 0.7541 | 0.2708  | 0.0575  | Ligballinol (p-coumarylresinol)              | Lignan             |
| 299.200557 | 299.200583 | C <sub>20</sub> H <sub>26</sub> O <sub>2</sub> | -0.087 | [M + H] <sup>++</sup> , M <sup>**</sup> | 0.0978 | 0.0753 | 0.1124  | 0.0434  | 0.6927  | 0.4948 | 1.2832  | 0.2791  | Abieta-6,8,11,13-tetraen-18-oic acid         | Terpenoid          |
| 300.062840 | 300.062840 | C <sub>16</sub> H <sub>12</sub> O <sub>6</sub> | 0.000  | [M + H] <sup>+</sup> , M <sup>***</sup> | 0.6927 | 0.5187 | 0.3437  | 0.1846  | 0.2825  | 0.3649 | 0.0691  | 0.2022  | Hispidulin                                   | Flavone            |
| 301.091794 | 301.091799 | C <sub>13</sub> H <sub>16</sub> O <sub>8</sub> | -0.018 | [M + H] <sup>++</sup> , M <sup>**</sup> | 0.0532 | 0.0155 | 0.0381  | 0.0235  | 0.0239  | 0.0285 | 0.0081  | 0.0149  | 4-Hydroxybenzoic acid 4-O-glucoside          | Phenolic glycoside |
| 301.179821 | 301.179845 | C <sub>19</sub> H <sub>24</sub> O <sub>3</sub> | -0.081 | [M + H] <sup>++</sup> , M <sup>**</sup> | 0.1122 | 0.1309 | 0.0784  | 0.0816  | N.A     | 0.1425 | 0.4452  | 0.1596  | Z-bornyl-p-coumarate                         | Phenolics          |
| 301.216207 | 301.216217 | C <sub>20</sub> H <sub>28</sub> O <sub>2</sub> | -0.035 | [M + H] <sup>++</sup> , M <sup>**</sup> | 0.0997 | 0.0657 | 0.1878  | 0.0612  | 2.0002  | 0.6026 | 2.6539  | 0.4684  | Dehydroabietic acid                          | Terpenoid          |
| 302.042104 | 302.042121 | C <sub>15</sub> H <sub>10</sub> O <sub>7</sub> | -0.057 | [M + H] <sup>+</sup> , M <sup>***</sup> | 1.3398 | 0.1018 | 2.7107  | 1.8616  | 0.6897  | 0.4761 | 0.0437  | 1.8939  | Quercetin                                    | Flavonol           |
| 302.224032 | 302.224035 | C <sub>20</sub> H <sub>30</sub> O <sub>2</sub> | -0.012 | [M + H] <sup>+</sup> , M <sup>***</sup> | 0.3169 | 0.6485 | 0.5622  | 0.6177  | 11.4255 | 3.8434 | 24.0070 | 5.5183  | Abietic acid                                 | Terpenoid          |
| 303.086315 | 303.086310 | C <sub>16</sub> H <sub>14</sub> O <sub>6</sub> | 0.016  | [M + H] <sup>++</sup> , M <sup>**</sup> | 0.2044 | 0.1748 | 1.0969  | 0.1152  | 0.1164  | 0.3214 | 0.1044  | 0.0539  | Methylaromadendrin                           | Flavanonol         |
| 303.107444 | 303.107476 | C <sub>13</sub> H <sub>18</sub> O <sub>8</sub> | -0.106 | [M + H] <sup>++</sup> , M <sup>**</sup> | 0.0127 | 0.0037 | 0.0236  | 0.0077  | 0.0053  |        | 0.0091  | N.A     | Tachioside                                   | Phenolic glycoside |
| 305.065579 | 305.065581 | C <sub>15</sub> H <sub>12</sub> O <sub>7</sub> | -0.004 | [M + H] <sup>++</sup> , M <sup>**</sup> | 0.1694 | 0.0751 | 0.1964  | 0.4417  | 0.1713  | 0.1602 | 0.0381  | 0.1333  | Taxifolin                                    | Flavanonol         |
| 305.101965 | 305.101925 | C <sub>16</sub> H <sub>16</sub> O <sub>6</sub> | 0.130  | [M + H] <sup>++</sup> , M <sup>**</sup> | 0.0593 | 0.0321 | 0.1373  | 0.0260  | 0.0330  | 0.0719 | 0.0668  | 0.0100  | 3'-O-methylcatechin                          | Flavan-3-ol        |
| 305.247507 | 305.247508 | C <sub>20</sub> H <sub>32</sub> O <sub>2</sub> | -0.005 | [M + H] <sup>++</sup> , M <sup>**</sup> | 0.0680 | 0.0483 | 0.0953  | 0.0523  | 1.1240  | 0.1034 | 0.3904  | 0.0964  | Anticopalic acid                             | Terpenoid          |
| 306.073404 | 306.073426 | C <sub>15</sub> H <sub>14</sub> O <sub>7</sub> | -0.069 | [M + H] <sup>+</sup> , M <sup>***</sup> | 1.4213 | 1.5443 | 1.7841  | 7.5764  | 0.6527  | 1.5087 | 0.0317  | 3.0854  | Gallocatechol                                | Flavan-3-ol        |

|            |            |                                                |        |                                         |         |         |        |        |        |        |        |        |                                                                    |                    |
|------------|------------|------------------------------------------------|--------|-----------------------------------------|---------|---------|--------|--------|--------|--------|--------|--------|--------------------------------------------------------------------|--------------------|
| 307.263157 | 307.263155 | C <sub>20</sub> H <sub>34</sub> O <sub>2</sub> | 0.006  | [M + H] <sup>+</sup>                    | 0.0396  | 0.0520  | 0.0965 | 0.0737 | 0.2080 | 0.0818 | 0.2202 | 0.1585 | 18-Hydroxymanool                                                   | Terpenoid          |
| 309.242421 | 309.242461 | C <sub>19</sub> H <sub>32</sub> O <sub>3</sub> | -0.127 | [M + H] <sup>++</sup> , M <sup>++</sup> | 0.0247  | 0.0305  | 0.0256 | 0.0723 | 0.0432 | 0.0368 | 0.1554 | 0.2156 | Nor-16-imbricatolic acid                                           | Terpenoid          |
| 314.078490 | 314.078522 | C <sub>17</sub> H <sub>14</sub> O <sub>6</sub> | -0.104 | [M + H] <sup>+</sup> , M <sup>+++</sup> | 0.3122  | 0.5957  | 1.1548 | 1.2376 | 0.1293 | 0.3304 | 0.1353 | 0.7100 | 3-O-Acetylpinobanksin                                              |                    |
| 314.224032 | 314.224022 | C <sub>21</sub> H <sub>30</sub> O <sub>2</sub> | 0.029  | [M + H] <sup>+</sup> , M <sup>+++</sup> | 0.0133  | 0.0171  | 0.0059 | 0.0159 | 0.5178 | 0.0776 | 0.0821 | 0.1490 | Methyl Dehydroabietate                                             | Terpenoid          |
| 315.195471 | 315.195428 | C <sub>20</sub> H <sub>26</sub> O <sub>3</sub> | 0.138  | [M + H] <sup>++</sup> , M <sup>++</sup> | 0.1671  | 0.1232  | 0.1015 | 0.1008 | 0.2719 | 0.2681 | 0.7014 | 0.2810 | Xanthoperol, 7-Oxodehydroabietic acid                              | Terpenoid          |
| 316.057754 | 316.057767 | C <sub>16</sub> H <sub>12</sub> O <sub>7</sub> | -0.042 | [M + H] <sup>+</sup> , M <sup>+++</sup> | 1.9601  | 0.4224  | 0.8228 | 2.3542 | 1.2959 | 1.1619 | 0.0512 | 2.2569 | Isorhamnetin                                                       | Flavonol           |
| 316.239682 | 316.239640 | C <sub>21</sub> H <sub>32</sub> O <sub>2</sub> | 0.133  | [M + H] <sup>+</sup> , M <sup>+++</sup> | 0.0127  | 0.0378  | 0.0050 | 0.0312 | 0.2686 | 0.2044 | 0.4340 | 0.8264 | Methyl Abietate                                                    | Terpenoid          |
| 317.086709 | 317.086735 | C <sub>13</sub> H <sub>16</sub> O <sub>9</sub> | -0.085 | [M + H] <sup>++</sup> , M <sup>++</sup> | N.A     | 0.0053  | 0.0139 | 0.0243 | N.A    | N.A    | N.A    | N.A    | Protocatechuic acid 4-O-glucoside                                  | Phenolic glycoside |
| 317.123094 | 317.123119 | C <sub>14</sub> H <sub>20</sub> O <sub>8</sub> | -0.080 | [M + H] <sup>++</sup> , M <sup>++</sup> | 0.0157  | N.A     | N.A    | N.A    | N.A    | N.A    | N.A    | N.A    | 3,4-Dimethoxyphenyl-beta-D-glucopyranoside                         | Phenolic glycoside |
| 317.174736 | 317.174695 | C <sub>19</sub> H <sub>24</sub> O <sub>4</sub> | 0.128  | [M + H] <sup>++</sup> , M <sup>++</sup> | 0.0513  | 0.0484  | 0.0395 | 0.0341 | 0.0343 | 0.0358 | 0.1636 | 0.0860 | Gibberellin A9                                                     | Terpenoid          |
| 317.211121 | 317.211134 | C <sub>20</sub> H <sub>28</sub> O <sub>3</sub> | -0.040 | [M + H] <sup>+</sup>                    | 0.0935  | 0.0784  | 0.1370 | 0.0495 | 0.3617 | 0.3918 | 0.6031 | 0.2576 | 12-Hydroxydehydroabietic Acid                                      | Terpenoid          |
| 318.037019 | 318.037047 | C <sub>15</sub> H <sub>10</sub> O <sub>8</sub> | -0.088 | [M + H] <sup>+</sup> , M <sup>+++</sup> | 0.0529  | 0.0174  | 0.0329 | 0.5802 | 0.0850 | 0.4891 | 0.0000 | 0.8264 | Myricetin                                                          | Flavonoid          |
| 319.081229 | 319.081216 | C <sub>16</sub> H <sub>14</sub> O <sub>7</sub> | 0.043  | [M + H] <sup>++</sup> , M <sup>++</sup> | 0.1296  | 0.0662  | 0.2501 | 0.0716 | 0.0522 | 0.1270 | 0.0183 | 0.0371 | Cedeodarin                                                         | Phenolics          |
| 319.226771 | 319.226788 | C <sub>20</sub> H <sub>30</sub> O <sub>3</sub> | -0.051 | [M + H] <sup>++</sup> , M <sup>++</sup> | 0.0543  | 0.0357  | 0.0772 | 0.0390 | 0.1856 | 0.0739 | 0.3465 | 0.1302 | 3-oxoanticopalic Acid                                              | Terpenoid          |
| 321.060494 | 321.060484 | C <sub>15</sub> H <sub>12</sub> O <sub>8</sub> | 0.030  | [M + H] <sup>++</sup> , M <sup>++</sup> | 0.0360  | 0.0130  | 0.0252 | 0.1567 | 0.0800 | 0.1502 | 0.0000 | 0.0549 | Ampelopsin                                                         | Flavanonol         |
| 321.096879 | 321.096923 | C <sub>16</sub> H <sub>16</sub> O <sub>7</sub> | -0.135 | [M + H] <sup>++</sup> , M <sup>++</sup> | 0.0537  | 0.0350  | 0.0830 | 0.0156 | 0.0396 | 0.3133 | 0.0240 | 0.0131 | 4'-O-Methylepigallocatechin                                        | Flavan-3-ol        |
| 321.242421 | 321.242388 | C <sub>20</sub> H <sub>32</sub> O <sub>3</sub> | 0.104  | [M + H] <sup>++</sup> , M <sup>++</sup> | 0.0370  | 0.0286  | 0.0518 | 0.0342 | 0.0915 | 0.0420 | 0.1580 | 0.0680 | Isocupressic, Hydroxyanticopalic Agatholic acid, Imbricatolic acid | Terpenoid          |
| 323.258071 | 323.258074 | C <sub>20</sub> H <sub>34</sub> O <sub>3</sub> | -0.007 | [M + H] <sup>++</sup> , M <sup>++</sup> | 0.0324  | 0.0292  | 0.0530 | 0.0565 | 0.0335 | 0.0306 | 0.1050 | 0.0730 | Imbricatolic, Dihydroagatholic acid                                | Terpenoid          |
| 325.091794 | 325.091754 | C <sub>15</sub> H <sub>16</sub> O <sub>8</sub> | 0.122  | [M + H] <sup>++</sup> , M <sup>++</sup> | 0.0139  | 0.0141  | 0.0830 | 0.0124 | 0.0057 | 0.0474 | 0.0530 | 0.0089 | Skimmin                                                            | Phenolic glycoside |
| 326.099619 | 326.099615 | C <sub>15</sub> H <sub>18</sub> O <sub>8</sub> | 0.011  | [M + H] <sup>++</sup> , M <sup>++</sup> | 0.0252  | 0.0119  | 0.0218 | 0.0572 | 0.0032 | 0.0054 | 0.0000 | 0.0000 | p-Coumaric acid glucoside                                          | Phenolic glycoside |
| 327.159086 | 327.159112 | C <sub>20</sub> H <sub>22</sub> O <sub>4</sub> | -0.081 | [M + H] <sup>++</sup> , M <sup>++</sup> | 0.9232  | 0.3183  | 1.6168 | 0.0742 | 0.7342 | 0.7362 | 0.3602 | 0.0299 | Picealactone B                                                     |                    |
| 328.130525 | 328.130537 | C <sub>19</sub> H <sub>20</sub> O <sub>5</sub> | -0.036 | [M + H] <sup>+</sup> , M <sup>+++</sup> | 33.0613 | 17.8940 | 8.0205 | 3.4426 | 6.0870 | 4.0908 | 1.7332 | 1.2619 | Demethoxypinoresinol                                               | Lignan             |
| 329.211121 | 329.211111 | C <sub>21</sub> H <sub>28</sub> O <sub>3</sub> | 0.033  | [M + H] <sup>++</sup> , M <sup>++</sup> | 0.0306  | 0.0216  | 0.0149 | 0.0192 | 0.0936 | 0.0776 | 0.0837 | 0.1251 | 7-Methyl-oxodehydroabietate                                        | Terpenoid          |
| 330.073404 | 330.073405 | C <sub>17</sub> H <sub>14</sub> O <sub>7</sub> | -0.003 | [M + H] <sup>+</sup> , M <sup>+++</sup> | 0.6418  | 0.6806  | 1.3555 | 0.3327 | 0.4982 | 0.7101 | 0.1518 | 0.2307 | Quercetin 3,4'-dimethyl ether                                      | Flavonol           |
| 330.146175 | 330.146129 | C <sub>19</sub> H <sub>22</sub> O <sub>5</sub> | 0.141  | [M + H] <sup>+</sup> , M <sup>+++</sup> | 1.0862  | 2.2233  | 1.2076 | 0.3943 | 0.1901 | 0.6295 | 0.3133 | 0.1665 | Gibberellin A7                                                     | Terpenoid          |
| 331.081229 | 331.081198 | C <sub>17</sub> H <sub>14</sub> O <sub>7</sub> | 0.095  | [M + H] <sup>+</sup>                    | 0.0944  | N.A     | N.A    | 0.0777 | 0.1472 | 0.1863 | 0.0421 | N.A    | Quercetin 3,4'-dimethyl ether                                      | Flavonol           |
| 331.190386 | 331.190412 | C <sub>20</sub> H <sub>26</sub> O <sub>4</sub> | -0.078 | [M + H] <sup>+</sup>                    | 0.0957  | 0.0538  | 0.0840 | 0.0507 | 0.0722 | 0.0673 | 0.2094 | 0.0588 | 15-Hydroxy-7-oxodehydroabietic acid                                | Terpenoid          |
| 332.052669 | 332.052697 | C <sub>16</sub> H <sub>12</sub> O <sub>8</sub> | -0.085 | [M + H] <sup>+</sup> , M <sup>+++</sup> | 0.3979  | 0.0490  | 0.1854 | 1.0412 | 0.1675 | 0.0765 | 0.0000 | 0.8627 | Laricitrin                                                         | Flavonol           |
| 332.198211 | 332.198216 | C <sub>20</sub> H <sub>28</sub> O <sub>4</sub> | -0.015 | [M + H] <sup>+</sup> , M <sup>+++</sup> | 0.0868  | 0.0923  | 0.1077 | 0.0580 | 0.0318 | 0.0655 | 0.1478 | 0.0551 | Pinusolic acid, Gibberellin A12                                    | Terpenoid          |



|            |            |                                                 |        |                                         |         |        |        |        |        |        |        |        |                                              |                     |
|------------|------------|-------------------------------------------------|--------|-----------------------------------------|---------|--------|--------|--------|--------|--------|--------|--------|----------------------------------------------|---------------------|
| 333.169650 | 333.169605 | C <sub>19</sub> H <sub>24</sub> O <sub>5</sub>  | 0.137  | [M + H] <sup>++</sup> , M <sup>**</sup> | 0.0330  | 0.0261 | 0.0322 | 0.0232 | 0.0128 | 0.0174 | 0.0593 | 0.0223 | Gibberellin A20                              | Terpenoid           |
| 333.278807 | 333.278828 | C <sub>22</sub> H <sub>36</sub> O <sub>2</sub>  | -0.062 | [M + H] <sup>++</sup> , M <sup>**</sup> | 0.0138  | 0.0158 | 0.0081 | 0.0436 | 0.0148 | 0.0215 | 0.0572 | 0.0504 | Acetyldihydroabietol                         | Terpenoid           |
| 335.221686 | 335.221696 | C <sub>20</sub> H <sub>30</sub> O <sub>4</sub>  | -0.031 | [M + H] <sup>++</sup> , M <sup>**</sup> | 0.0583  | 0.0378 | 0.0743 | 0.0333 | 0.2720 | 0.1435 | 0.1450 | 0.0938 | Dehydropinifolic acid                        | Terpenoid           |
| 335.258071 | 335.258109 | C <sub>21</sub> H <sub>34</sub> O <sub>3</sub>  | -0.113 | [M + H] <sup>++</sup> , M <sup>**</sup> | 0.0271  | 0.0347 | 0.0289 | 0.1140 | 5.7854 | 1.7415 | 2.7076 | 4.1066 | Methyl ester of isocupressic                 | Terpenoid           |
| 337.237336 | 337.237339 | C <sub>20</sub> H <sub>32</sub> O <sub>4</sub>  | -0.009 | [M + H] <sup>++</sup> , M <sup>**</sup> | 0.0223  | 0.0242 | 0.0310 | 0.0257 | 0.0416 | 0.0186 | 0.0693 | 0.0447 | Pinifolic acid                               | Terpenoid           |
| 339.107444 | 339.107392 | C <sub>16</sub> H <sub>18</sub> O <sub>8</sub>  | 0.154  | [M + H] <sup>++</sup> , M <sup>**</sup> | 0.0541  | 0.0246 | 0.1052 | 0.0127 | 0.0774 | 0.1232 | 0.0188 | 0.0106 | 3-p-Coumaroylquinic acid                     | Phenolic acid       |
| 341.138350 | 341.138340 | C <sub>20</sub> H <sub>20</sub> O <sub>5</sub>  | 0.029  | [M + H] <sup>++</sup> , M <sup>**</sup> | 10.5325 | N.A    | 1.2526 | 0.3539 | 2.8085 | 1.4094 | 0.4444 | 0.1054 | 8-Prenylnaringenin                           | Flavonoid           |
| 342.130919 | 342.130964 | C <sub>16</sub> H <sub>22</sub> O <sub>8</sub>  | -0.132 | [M + H] <sup>+</sup> , M <sup>***</sup> | 0.1653  | 0.2866 | 2.2654 | 0.0142 | 0.0584 | 0.1619 | 0.5487 | 0.0336 | Coniferin                                    | Phenolic glycoside  |
| 343.102359 | 343.102394 | C <sub>15</sub> H <sub>18</sub> O <sub>9</sub>  | -0.104 | [M + H] <sup>++</sup> , M <sup>**</sup> | N.A     | N.A    | 0.0314 | N.A    | N.A    | N.A    | N.A    | N.A    | Glucocaffeic acid                            | Phenolic glycoside  |
| 344.146569 | 344.146609 | C <sub>16</sub> H <sub>24</sub> O <sub>8</sub>  | -0.115 | [M + H] <sup>+</sup> , M <sup>***</sup> | 0.1792  | 0.4531 | 0.2067 | 0.0376 | 0.0190 | 0.1596 | 0.0378 | 0.0097 | Dihydroconiferin                             | Phenolic glycoside  |
| 345.096879 | 345.096868 | C <sub>18</sub> H <sub>16</sub> O <sub>7</sub>  | 0.034  | [M + H] <sup>++</sup> , M <sup>**</sup> | 0.0841  | 0.0630 | 0.1499 | 0.0320 | 0.0459 | 0.1203 | 0.0357 | 0.0254 | Cirsilineol                                  | Flavone             |
| 346.068319 | 346.068312 | C <sub>17</sub> H <sub>14</sub> O <sub>8</sub>  | 0.020  | [M + H] <sup>++</sup> , M <sup>**</sup> | 0.6557  | 0.1534 | 0.5538 | 1.6253 | 0.2565 | 0.1238 | 0.0227 | 1.1918 | Syringetin                                   | Flavonol            |
| 346.141090 | 346.141055 | C <sub>19</sub> H <sub>22</sub> O <sub>6</sub>  | 0.101  | [M + H] <sup>+</sup> , M <sup>***</sup> | 11.9544 | 9.0958 | 6.1776 | 1.0196 | 2.0334 | 2.9284 | 1.7660 | 0.3871 | Taxiresinol, Gibberellin A3                  | Lignan              |
| 347.221686 | 347.221632 | C <sub>21</sub> H <sub>30</sub> O <sub>4</sub>  | 0.154  | [M + H] <sup>++</sup> , M <sup>**</sup> | 0.0254  | 0.0124 | 0.0163 | 0.0204 | 0.0610 | 0.0350 | 0.0641 | 0.1000 | Pinusolide                                   | Terpenoid           |
| 349.164565 | 349.164559 | C <sub>19</sub> H <sub>24</sub> O <sub>6</sub>  | 0.017  | [M + H] <sup>++</sup> , M <sup>**</sup> | 0.0194  | 0.0109 | 0.0209 | 0.0119 | 0.0093 | 0.0112 | 0.0165 | 0.0094 | Gibberellin A1                               | Terpenoid           |
| 349.200950 | 349.200984 | C <sub>20</sub> H <sub>28</sub> O <sub>5</sub>  | -0.097 | [M + H] <sup>++</sup> , M <sup>**</sup> | 0.0764  | 0.0432 | 0.0557 | 0.0360 | 0.0302 | 0.0417 | 0.1189 | 0.0363 | Gibberellin A15                              | Terpenoid           |
| 351.216601 | 351.216595 | C <sub>20</sub> H <sub>30</sub> O <sub>5</sub>  | 0.016  | [M + H] <sup>++</sup> , M <sup>**</sup> | 0.0371  | 0.0296 | 0.0625 | 0.0246 | 0.0344 | 0.0291 | 0.0626 | 0.0474 | Andrographolide                              |                     |
| 351.252986 | 351.253020 | C <sub>21</sub> H <sub>34</sub> O <sub>4</sub>  | -0.096 | [M + H] <sup>++</sup> , M <sup>**</sup> | 0.0402  | 0.0340 | 0.0214 | 0.0731 | 1.0833 | 0.1619 | 0.3208 | 0.7838 | Pinifolate, Nor-16-acetylimbricaticol        | Terpenoid           |
| 354.094534 | 354.094518 | C <sub>16</sub> H <sub>18</sub> O <sub>9</sub>  | 0.044  | [M + H] <sup>+</sup> , M <sup>***</sup> | 0.0166  | 0.0250 | 0.0158 | 0.0000 | 0.0091 | 0.0217 | 0.0211 | 0.0075 | Chlorogenic Acid                             | Phenolic acid       |
| 355.117615 | 355.117607 | C <sub>20</sub> H <sub>18</sub> O <sub>6</sub>  | 0.022  | [M + H] <sup>++</sup> , M <sup>**</sup> | 0.1410  | 0.1488 | 0.1491 | 0.0000 | 0.0721 | 0.1472 | 0.0522 | 0.0244 | Episesamin                                   |                     |
| 357.081623 | 357.081641 | C <sub>15</sub> H <sub>16</sub> O <sub>10</sub> | -0.050 | [M + H] <sup>+</sup>                    | 0.0048  | N.A    | N.A    | N.A    | N.A    | N.A    | N.A    | N.A    | Caffeic acid 3-O-glucuronide                 | Phenolic glycoside  |
| 357.118009 | 357.118012 | C <sub>16</sub> H <sub>20</sub> O <sub>9</sub>  | -0.010 | [M + H] <sup>+</sup>                    | 0.0304  | N.A    | 0.0403 | 0.0066 | 0.0078 | 0.0054 | 0.0065 | N.A    | 1-O-Feruloyl-beta-D-glucose                  | Phenolic glycoside  |
| 357.133265 | 357.133277 | C <sub>20</sub> H <sub>20</sub> O <sub>6</sub>  | -0.034 | [M + H] <sup>++</sup> , M <sup>**</sup> | 0.3173  | 0.2402 | 0.3460 | 0.0580 | 0.1268 | 0.3011 | 0.1420 | 0.0274 | α-Conidendrin                                | Lignan              |
| 358.125834 | 358.125843 | C <sub>16</sub> H <sub>22</sub> O <sub>9</sub>  | -0.026 | M <sup>***</sup>                        | 0.3498  | 0.0879 | 0.5577 | 0.0569 | 0.0116 | 0.0195 | 0.0228 | 0.0076 | Junipediol B 8-glucoside                     | Flavonoid glucoside |
| 358.141090 | 358.141114 | C <sub>20</sub> H <sub>22</sub> O <sub>6</sub>  | -0.067 | [M + H] <sup>+</sup> , M <sup>***</sup> | 0.7686  | 1.7583 | 2.0595 | 0.2437 | 0.1255 | 0.6930 | 0.5539 | 0.0889 | Pinoresinol                                  | Lignan              |
| 360.083969 | 360.083958 | C <sub>18</sub> H <sub>16</sub> O <sub>8</sub>  | 0.031  | [M + H] <sup>+</sup> , M <sup>***</sup> | 0.0947  | 0.0382 | 0.0715 | 0.0491 | 0.0203 | 0.0321 | 0.0110 | 0.0448 | Irigenin                                     | Flavone             |
| 360.141484 | 360.141463 | C <sub>16</sub> H <sub>24</sub> O <sub>9</sub>  | 0.057  | [M + H] <sup>+</sup> , M <sup>***</sup> | 0.0417  | 0.0382 | 1.2886 | 0.0061 | 0.0061 | 0.0169 | 0.2765 | N.A    | Junipediol A 8-glucoside                     | Flavonoid glucoside |
| 360.156740 | 360.156751 | C <sub>20</sub> H <sub>24</sub> O <sub>6</sub>  | -0.031 | [M + H] <sup>+</sup> , M <sup>***</sup> | 2.8340  | 3.9036 | 1.5499 | 0.6984 | 0.7485 | 1.8734 | 0.4348 | 0.2814 | Lariciresinol                                | Lignan              |
| 361.237336 | 361.237360 | C <sub>22</sub> H <sub>32</sub> O <sub>4</sub>  | -0.066 | [M + H] <sup>++</sup> , M <sup>**</sup> | 0.0082  | 0.0065 | 0.0084 | 0.0124 | 0.0172 | 0.0183 | 0.0385 | 0.0886 | 7-Acetoxyabietic acid                        | Terpenoid           |
| 362.172390 | 362.172395 | C <sub>20</sub> H <sub>26</sub> O <sub>6</sub>  | -0.013 | [M + H] <sup>+</sup> , M <sup>***</sup> | 0.3701  | 0.4802 | 0.5255 | 0.1417 | 0.0594 | 0.1779 | 0.0730 | 0.0264 | Secoisolariciresinol                         | Lignan              |
| 363.252986 | 363.253010 | C <sub>22</sub> H <sub>34</sub> O <sub>4</sub>  | -0.067 | [M + H] <sup>++</sup> , M <sup>**</sup> | 0.0062  | 0.0074 | 0.0055 | 0.0196 | 0.0396 | 0.0196 | 0.0439 | 0.0808 | 3 beta- Acetoxyantipalic, Acetylisocupressic | Terpenoid           |

|            |            |                                                 |        |                                                                 |        |        |        |        |        |        |        |        |                                       |                    |
|------------|------------|-------------------------------------------------|--------|-----------------------------------------------------------------|--------|--------|--------|--------|--------|--------|--------|--------|---------------------------------------|--------------------|
| 364.151655 | 364.151670 | C <sub>19</sub> H <sub>24</sub> O <sub>7</sub>  | -0.042 | [M + H] <sup>+</sup> , M <sup>***</sup>                         | 0.0139 | 0.0179 | 0.0175 | 0.0054 | 0.0000 | 0.0112 | 0.0088 | N.A    | Gibberellin A8                        | Terpenoid          |
| 365.268636 | 365.268648 | C <sub>22</sub> H <sub>36</sub> O <sub>4</sub>  | -0.032 | [M + H] <sup>++</sup> , M <sup>**</sup>                         | 0.0077 | 0.0169 | N.A    | 0.0144 | N.A    | 0.0153 | 0.0368 | 0.0483 | Acetylumbriatic acid                  | Terpenoid          |
| 368.110184 | 368.110204 | C <sub>17</sub> H <sub>20</sub> O <sub>9</sub>  | -0.057 | M <sup>***</sup>                                                | 0.071  | 0.1846 | 0.0596 | 0.0427 | 0.0054 | 0.1218 | 0.0000 | 0.0135 | 3-Feruloylquinic acid                 | Phenolic acid      |
| 371.097273 | 371.097301 | C <sub>16</sub> H <sub>18</sub> O <sub>10</sub> | -0.074 | [M + H] <sup>++</sup> , M <sup>**</sup>                         | N.A    | N.A    | 0.0058 | N.A    | N.A    | N.A    | N.A    | N.A    | Ferulic acid 4-O-glucuronide          | Phenolic glycoside |
| 373.112923 | 373.112917 | C <sub>16</sub> H <sub>20</sub> O <sub>10</sub> | 0.016  | [M + H] <sup>++</sup> , M <sup>**</sup>                         | N.A    | N.A    | 0.0069 | N.A    | N.A    | N.A    | N.A    | N.A    | Dihydroferulic acid 4-O-glucuronide   | Phenolic glycoside |
| 373.149309 | 373.149248 | C <sub>17</sub> H <sub>24</sub> O <sub>9</sub>  | 0.162  | [M + H] <sup>++</sup> , M <sup>**</sup>                         | 0.0084 | N.A    | N.A    | N.A    | N.A    | N.A    | N.A    | N.A    | Syringin                              | Phenolic glycoside |
| 373.164565 | 373.164598 | C <sub>21</sub> H <sub>24</sub> O <sub>6</sub>  | -0.087 | [M + H] <sup>++</sup> , M <sup>**</sup>                         | 0.0169 | 0.0142 | 0.0481 | 0.0073 | 0.0106 | 0.0151 | 0.0255 | N.A    | Arctigenin                            |                    |
| 374.099619 | 374.099628 | C <sub>19</sub> H <sub>18</sub> O <sub>8</sub>  | -0.024 | [M + H] <sup>+</sup> , M <sup>***</sup>                         | 0.0535 | 0.0297 | 0.0990 | 0.0246 | 0.0388 | 0.0418 | 0.0091 | 0.0838 | Junipegenin C                         | Flavone            |
| 375.143829 | 375.143820 | C <sub>20</sub> H <sub>22</sub> O <sub>7</sub>  | 0.026  | [M + H] <sup>++</sup> , M <sup>**</sup>                         | 0.1129 | N.A    | 0.1045 | 0.0172 | 0.0633 | 0.2705 | 0.0268 | 0.0085 | Hydroxymatairesinol, nortrachelogenin | Lignan             |
| 377.159480 | 377.159546 | C <sub>20</sub> H <sub>24</sub> O <sub>7</sub>  | -0.177 | [M + H] <sup>++</sup> , M <sup>**</sup>                         | 0.0164 | 0.0090 | 0.0176 | 0.0043 | 0.0120 | 0.0202 | 0.0118 | 0.0107 | Todolactol A                          | Lignan             |
| 386.099619 | 386.099615 | C <sub>20</sub> H <sub>18</sub> O <sub>8</sub>  | 0.010  | [M + H] <sup>+</sup> , M <sup>***</sup>                         | 0.0811 | 0.0418 | 0.3666 | 0.0635 | 0.0145 | 0.0347 | 0.0109 | 0.0264 | Diferulic acid                        | Phenolic acid      |
| 386.157134 | 386.157163 | C <sub>18</sub> H <sub>26</sub> O <sub>9</sub>  | -0.075 | [M + H] <sup>+</sup> , M <sup>***</sup>                         | 0.0148 | 0.0122 | 1.7455 | 0.0000 | 0.0039 | 0.0000 | 1.0732 | 0.0000 | Juniperoside                          | Phenolic glycoside |
| 387.201344 | 387.201356 | C <sub>19</sub> H <sub>30</sub> O <sub>8</sub>  | -0.029 | [M + H] <sup>++</sup> , M <sup>**</sup>                         | 0.0120 | 0.0084 | 0.1098 | 0.0064 | 0.0067 | 0.0150 | 0.0217 |        | Junipeionolide, Corchoionoside C      |                    |
| 389.159480 | 389.159502 | C <sub>21</sub> H <sub>24</sub> O <sub>7</sub>  | -0.057 | [M + H] <sup>++</sup> , M <sup>**</sup>                         | 0.0509 | 0.0203 | 0.1044 | 0.0055 | 0.0257 | 0.0225 | 0.0415 | N.A    | Dihydrosamidin                        |                    |
| 390.130919 | 390.130947 | C <sub>20</sub> H <sub>22</sub> O <sub>8</sub>  | -0.071 | [M + H] <sup>+</sup> , M <sup>***</sup>                         | 0.1597 | 0.7013 | 0.1452 | 0.0253 | 0.0271 | 0.4285 | 0.0178 | 0.0099 | Piceid                                | Stilbenoid         |
| 390.152048 | 390.152033 | C <sub>17</sub> H <sub>26</sub> O <sub>10</sub> | 0.039  | M <sup>***</sup>                                                | 0.0242 | 0.0466 | 0.5828 | 0.0067 | 0.0023 | 0.0131 | 0.1012 | N.A    | Loganin                               |                    |
| 391.175130 | 391.175062 | C <sub>21</sub> H <sub>26</sub> O <sub>7</sub>  | 0.174  | [M + H] <sup>++</sup> , M <sup>**</sup>                         | 0.0120 | 0.0062 | 0.0152 | 0.0062 | 0.0039 | N.A    | 0.0080 | N.A    | 5'-Methoxylariciresinol               | Lignan             |
| 397.382878 | 397.382864 | C <sub>29</sub> H <sub>48</sub>                 | 0.036  | [M + H] <sup>++</sup> , M <sup>**</sup>                         | 0.0498 | 0.0391 | 0.0246 | 0.0434 | 3.0890 | 1.6878 | 1.2654 | 0.9491 | Stigmastan-3,5-diene                  | Sterol             |
| 398.136004 | 398.136046 | C <sub>22</sub> H <sub>22</sub> O <sub>7</sub>  | -0.105 | [M + H] <sup>+</sup> , M <sup>***</sup>                         | 0.0965 | 0.0697 | 1.0248 | 0.0236 | 0.0238 | 0.0310 | 1.8971 | 0.0103 | Deoxypodophyllotoxin                  | Lignan             |
| 399.128573 | 399.128576 | C <sub>18</sub> H <sub>22</sub> O <sub>10</sub> | -0.007 | [M + H] <sup>++</sup> , M <sup>**</sup>                         | N.A    | 0.0057 | N.A    | N.A    | N.A    | N.A    | N.A    | N.A    | 3-Sinapoylquinic acid                 | Phenolic acid      |
| 400.151655 | 400.151630 | C <sub>22</sub> H <sub>24</sub> O <sub>7</sub>  | 0.061  | [M + H] <sub>+</sub> <sup>+</sup> , M <sub>+</sub> <sup>+</sup> | 0.0657 | 0.1459 | 0.6889 | 0.0238 | 0.0128 | 0.0669 | 0.4556 | 0.0144 | Deoxypodorhizone                      |                    |
| 401.232251 | 401.232164 | C <sub>24</sub> H <sub>32</sub> O <sub>5</sub>  | 0.215  | [M + H] <sub>+</sub> <sup>+</sup> , M <sub>+</sub> <sup>+</sup> | 0.0066 | 0.0079 | 0.0042 | 0.0072 | 0.0098 | 0.0492 | N.A    | 0.0215 | Succinyl 7-oxodehydroabietol          | Terpenoid          |
| 401.377793 | 401.377739 | C <sub>28</sub> H <sub>48</sub> O               | 0.132  | [M + H] <sub>+</sub> <sup>+</sup> , M <sub>+</sub> <sup>+</sup> | N.A    | 0.0045 | N.A    | 0.0157 | 0.0038 | 0.0108 | 0.0127 | 0.0249 | Campesterol                           | Sterol             |
| 403.393443 | 403.393416 | C <sub>28</sub> H <sub>50</sub> O               | 0.065  | [M + H] <sub>+</sub> <sup>+</sup> , M <sub>+</sub> <sup>+</sup> | N.A    | 0.0055 | N.A    | 0.0560 | 0.0025 | 0.0115 | 0.0127 | 0.0755 | Campestanol                           | Sterol             |
| 406.125834 | 406.125863 | C <sub>20</sub> H <sub>22</sub> O <sub>9</sub>  | -0.072 | [M + H] <sub>+</sub> <sup>+</sup> , M <sub>+</sub> <sup>+</sup> | 0.0209 | 1.7241 | 0.0277 | 0.0148 | 0.0051 | 1.9581 | 0.0000 | 0.0062 | Astringin                             | Stilbenoid         |
| 413.123094 | 413.123140 | C <sub>22</sub> H <sub>20</sub> O <sub>8</sub>  | -0.110 | [M + H] <sub>+</sub> <sup>+</sup> , M <sub>+</sub> <sup>+</sup> | 0.0157 | 0.0208 | 0.0436 | N.A    | 0.0106 | 0.0200 | N.A    | N.A    | Podophyllotoxone                      |                    |
| 413.377793 | 413.377832 | C <sub>29</sub> H <sub>48</sub> O               | -0.097 | [M + H] <sub>+</sub> <sup>+</sup> , M <sub>+</sub> <sup>+</sup> | 0.0860 | 0.0574 | 0.0385 | 0.0415 | 0.2188 | 0.3141 | 0.3081 | 0.2479 | Stigmasterol                          | Sterol             |
| 414.203690 | 414.203643 | C <sub>24</sub> H <sub>30</sub> O <sub>6</sub>  | 0.114  | [M + H] <sub>+</sub> <sup>+</sup> , M <sub>+</sub> <sup>+</sup> | 0.0350 | 0.9153 | 0.0495 | 0.9114 | 0.0132 | 0.0523 | 0.0175 | 0.0282 | Magnoshinin                           | Lignan             |
| 415.138744 | 415.138698 | C <sub>22</sub> H <sub>22</sub> O <sub>8</sub>  | 0.111  | [M + H] <sub>+</sub> <sup>+</sup> , M <sub>+</sub> <sup>+</sup> | 0.0131 | 0.0097 | 0.0452 | N.A    | 0.0104 | 0.0126 | 0.0176 | N.A    | Picropodophyllotoxin, Podophyllotoxin |                    |
| 415.393443 | 415.393396 | C <sub>29</sub> H <sub>50</sub> O               | 0.112  | [M + H] <sub>+</sub> <sup>+</sup> , M <sub>+</sub> <sup>+</sup> | N.A    | 0.0043 | N.A    | 0.0171 | 0.0104 | N.A    | 0.0234 | 0.0232 | Beta-Sitosterol                       | Sterol             |
| 417.118009 | 417.117984 | C <sub>21</sub> H <sub>20</sub> O <sub>9</sub>  | 0.060  | [M + H] <sub>+</sub> <sup>+</sup> , M <sub>+</sub> <sup>+</sup> | N.A    | N.A    | N.A    | 0.1259 | 0.0282 | 0.0474 | 0.0114 | 0.0402 | Apigenin 7-rhamnoside                 | Flavonoid          |

|            |            |                                                 |        |                                       |        |         |        |        |        |        |        |        |                                        |                     |
|------------|------------|-------------------------------------------------|--------|---------------------------------------|--------|---------|--------|--------|--------|--------|--------|--------|----------------------------------------|---------------------|
| 417.409093 | 417.409073 | C <sub>29</sub> H <sub>52</sub> O               | 0.048  | [M + H] <sup>+</sup> , M <sub>+</sub> | N.A    | 0.0045  | N.A    | 0.0360 | 0.0060 | 0.0091 | 0.0217 | 0.0355 | Stigmastanol                           | Sterol              |
| 418.162219 | 418.162201 | C <sub>22</sub> H <sub>26</sub> O <sub>8</sub>  | 0.044  | [M + H] <sup>+</sup> , M <sub>+</sub> | 0.0341 | 0.0579  | 1.2513 | N.A    | 0.0047 | 0.0285 | 0.1688 | N.A    | Syringaresinol                         | Lignan              |
| 419.097273 | 419.097297 | C <sub>20</sub> H <sub>18</sub> O <sub>10</sub> | -0.057 | [M + H] <sup>+</sup> , M <sub>+</sub> | 0.0047 | N.A     | 0.0448 | N.A    | N.A    | 0.0072 | 0.0148 | N.A    | Salvianolic acid G                     | Phenolic acid       |
| 420.141484 | 420.141543 | C <sub>21</sub> H <sub>24</sub> O <sub>9</sub>  | -0.141 | [M + H] <sup>+</sup> , M <sub>+</sub> | 0.0412 | 16.5703 | N.A    | 0.0113 | 0.0099 | 6.5395 | 0.0090 | N.A    | Isorhapontin                           | Stilbenoid          |
| 421.258465 | 421.258527 | C <sub>24</sub> H <sub>36</sub> O <sub>6</sub>  | -0.146 | [M + H] <sup>+</sup> , M <sub>+</sub> | 0.0059 | 0.0063  | 0.0038 | 0.0061 | 0.0106 | 0.0169 | 0.0184 | 0.0419 | Succinylisocupresic, succinylagatholic | Terpenoid           |
| 421.440393 | 421.440369 | C <sub>29</sub> H <sub>56</sub> O               | 0.057  | [M + H] <sup>+</sup>                  | 0.0369 | 0.0304  | 0.0224 | 0.3997 | 0.0985 | 0.1084 | 0.3826 | 0.8514 | 9-nonacosene-2-one                     |                     |
| 423.456043 | 423.456094 | C <sub>29</sub> H <sub>58</sub> O               | -0.120 | [M + H] <sup>+</sup>                  | 0.0661 | 0.0493  | 0.0384 | 0.5786 | 0.1178 | 0.1839 | 0.4199 | 0.8777 | 10-nonacosanal, 10-nonacosanol         |                     |
| 427.393443 | 427.393489 | C <sub>30</sub> H <sub>50</sub> O               | -0.108 | [M + H] <sup>+</sup> , M <sub>+</sub> | N.A    | 0.0032  | N.A    | 0.0104 | N.A    | N.A    | N.A    | N.A    | Cycloartenol                           | Sterol              |
| 430.380532 | 430.380554 | C <sub>29</sub> H <sub>50</sub> O <sub>2</sub>  | -0.050 | [M + H] <sup>+</sup> , M <sub>+</sub> | 0.0132 | 0.1211  | 0.0090 | 0.0239 | 1.1481 | 0.9519 | 1.0568 | 0.7275 | α-Tocopherol                           | Lipids              |
| 432.105098 | 432.105133 | C <sub>21</sub> H <sub>20</sub> O <sub>10</sub> | -0.081 | [M + H] <sup>+</sup> , M <sub>+</sub> | 0.0356 | 0.0622  | 0.0812 | 8.3353 | 0.0094 | 0.0456 | 0.0102 | 1.9340 | Kaempferol-3-O-rhamnoside              | Flavonoid           |
| 434.084363 | 434.084403 | C <sub>20</sub> H <sub>18</sub> O <sub>11</sub> | -0.092 | [M + H] <sup>+</sup>                  | N.A    | N.A     | 0.0060 | N.A    | N.A    | N.A    | N.A    | N.A    | Quercetin 3-O-arabinoside              | Flavonol            |
| 437.144223 | 437.144207 | C <sub>21</sub> H <sub>24</sub> O <sub>10</sub> | 0.036  | [M + H] <sup>+</sup> , M <sub>+</sub> | 0.0055 | N.A     | 0.0072 | N.A    | N.A    | N.A    | N.A    | N.A    | Phloridzin                             | Phenolics           |
| 439.393443 | 439.393466 | C <sub>31</sub> H <sub>50</sub> O               | -0.073 | [M + H] <sup>+</sup> , M <sub>+</sub> | 0.0000 | 0.0033  | 0.0000 | 0.0056 | 0.0136 | 0.0284 | 0.0088 | 0.0207 | 24-Methylenecycloartan-3-one           | Sterol              |
| 441.409093 | 441.409057 | C <sub>31</sub> H <sub>52</sub> O               | 0.082  | [M + H] <sup>+</sup> , M <sub>+</sub> | N.A    | N.A     | N.A    | 0.0095 | 0.0022 | 0.0141 | N.A    | 0.0097 | 24-Methylenecycloartanol               | Sterol              |
| 443.097273 | 443.097253 | C <sub>22</sub> H <sub>18</sub> O <sub>10</sub> | 0.047  | [M + H] <sup>+</sup> , M <sub>+</sub> | N.A    | N.A     | N.A    | 0.0338 | 0.0034 | 0.0060 | N.A    | 0.0138 | Epicatechin-3-gallate                  | Flavan-3-ol         |
| 449.107838 | 449.107882 | C <sub>21</sub> H <sub>20</sub> O <sub>11</sub> | -0.097 | [M + H] <sup>+</sup> , M <sub>+</sub> | 0.0240 | 0.0090  | 0.0700 | N.A    | 0.0534 | 0.1067 | N.A    | 0.0938 | Astragalin                             | Flavonoid glucoside |
| 453.139138 | 453.139174 | C <sub>21</sub> H <sub>24</sub> O <sub>11</sub> | -0.080 | [M + H] <sup>+</sup>                  | N.A    | N.A     | 0.0153 | N.A    | N.A    | N.A    | N.A    | N.A    | Catechin-3-glucoside                   | Flavonoid glucoside |
| 461.107838 | 461.107874 | C <sub>22</sub> H <sub>20</sub> O <sub>11</sub> | -0.077 | [M + H] <sup>+</sup> , M <sub>+</sub> | N.A    | 0.0035  | 0.0061 | 0.5062 | N.A    | N.A    | N.A    | N.A    | Apigenin 7-O-glucuronide methyl ester  | Flavonoid glucoside |
| 463.123488 | 463.123483 | C <sub>22</sub> H <sub>22</sub> O <sub>11</sub> | 0.011  | [M + H] <sup>+</sup> , M <sub>+</sub> | 0.0177 | 0.0207  | 0.0331 | 0.0212 | 0.0475 | 0.0665 | 0.0110 | 0.0085 | Chrysoeriol 7-O-glucoside              | Flavonoid           |
| 465.102753 | 465.102787 | C <sub>21</sub> H <sub>20</sub> O <sub>12</sub> | -0.074 | [M + H] <sup>+</sup> , M <sub>+</sub> | 0.0096 | N.A     | 0.0357 | N.A    | 0.0335 | 0.0419 | N.A    | N.A    | Hyperoside                             | Flavonoid           |
| 465.357451 | 465.357423 | C <sub>28</sub> H <sub>48</sub> O <sub>5</sub>  | 0.060  | [M + H] <sup>+</sup> , M <sub>+</sub> | N.A    | 0.0104  | N.A    | 0.0042 | 0.0176 | 0.0139 | 0.0217 | 0.0237 | Castasterone                           | Sterol              |
| 478.183349 | 478.183401 | C <sub>24</sub> H <sub>30</sub> O <sub>10</sub> | -0.109 | M <sub>+</sub>                        | 0.2808 | 0.3169  | 0.6092 | 0.0866 | 0.0807 | 0.1324 | 0.0632 | 0.0193 | Junipercomnoside A                     |                     |
| 479.118403 | 479.118376 | C <sub>22</sub> H <sub>22</sub> O <sub>12</sub> | 0.055  | [M + H] <sup>+</sup> , M <sub>+</sub> | 0.0196 | N.A     | 0.0231 | 0.0070 | 0.0506 | 0.0192 | N.A    | 0.0080 | 3'-O-methylquercetin 3-glucoside       | Phenolic glycoside  |
| 479.118403 | 479.118150 | C <sub>22</sub> H <sub>22</sub> O <sub>12</sub> | 0.527  | [M + H] <sup>+</sup>                  | N.A    | 0.0030  | N.A    | N.A    | N.A    | N.A    | N.A    | N.A    | 3-O-methylquercetin 3-glucoside        | Phenolic glycoside  |
| 481.352366 | 481.352311 | C <sub>28</sub> H <sub>48</sub> O <sub>6</sub>  | 0.114  | [M + H] <sup>+</sup> , M <sub>+</sub> | N.A    | 0.0045  | N.A    | N.A    | N.A    | N.A    | N.A    | N.A    | Brassinolide                           |                     |
| 491.118403 | 491.118407 | C <sub>23</sub> H <sub>22</sub> O <sub>12</sub> | -0.010 | [M + H] <sup>+</sup>                  | 0.0103 | N.A     | N.A    | N.A    | 0.0178 | N.A    | N.A    | N.A    | Kaempferol 3-(6"-acetylglucoside)      | Flavonoid glucoside |
| 495.113317 | 495.113276 | C <sub>22</sub> H <sub>22</sub> O <sub>13</sub> | 0.084  | [M + H] <sup>+</sup>                  | N.A    | N.A     | 0.0144 | N.A    | N.A    | N.A    | N.A    | N.A    | Laricitrin 3-glucoside                 | Flavonoid glucoside |
| 506.214649 | 506.214640 | C <sub>26</sub> H <sub>34</sub> O <sub>10</sub> | 0.016  | [M + H] <sup>+</sup>                  | 0.2729 | 0.4089  | 0.5120 | 0.0102 | 0.0514 | 0.1578 | 0.0787 | N.A    | Icariside E4                           |                     |
| 507.113317 | 507.113332 | C <sub>23</sub> H <sub>22</sub> O <sub>13</sub> | -0.030 | [M + H] <sup>+</sup>                  | 0.0137 | N.A     | 0.0051 | N.A    | 0.0417 | N.A    | N.A    | N.A    | Quercetin 3-(6"-acetylglucoside)       | Flavonoid glucoside |
| 507.149703 | 507.149680 | C <sub>24</sub> H <sub>26</sub> O <sub>12</sub> | 0.044  | [M + H] <sup>+</sup> , M <sub>+</sub> | 0.0098 | 0.0345  | N.A    | N.A    | 0.0126 | 0.1187 | N.A    | N.A    | Junipegenin B 7-O-glucoside            | Flavonoid glucoside |

|            |            |                                                 |        |                                         |        |        |        |        |        |        |        |        |                                        |                     |
|------------|------------|-------------------------------------------------|--------|-----------------------------------------|--------|--------|--------|--------|--------|--------|--------|--------|----------------------------------------|---------------------|
| 508.193913 | 508.193894 | C <sub>25</sub> H <sub>32</sub> O <sub>11</sub> | 0.037  | M <sup>++</sup>                         | 0.1019 | 0.8397 | 1.5628 | 0.0717 | 0.0228 | 0.3341 | 0.1169 | 0.0162 | Gibberellin 2-O-beta-D-glucoside       |                     |
| 509.128967 | 509.128861 | C <sub>23</sub> H <sub>24</sub> O <sub>13</sub> | 0.208  | [M + H] <sup>+</sup>                    | N.A    | N.A    | 0.0102 | N.A    | N.A    | N.A    | N.A    | N.A    | Syringetin 3-glucoside                 | Flavonoid glucoside |
| 522.209563 | 522.209520 | C <sub>26</sub> H <sub>34</sub> O <sub>11</sub> | 0.084  | M <sup>+++</sup>                        | N.A    | 0.0728 | N.A    | 0.0241 | N.A    | N.A    | N.A    | N.A    | lariciresinol glycoside                | Lignan              |
| 526.183349 | 526.183339 | C <sub>28</sub> H <sub>30</sub> O <sub>10</sub> | 0.018  | M <sup>+++</sup>                        | 0.0063 | 0.0102 | 0.0136 | N.A    | N.A    | 0.0092 | N.A    | N.A    | Pilosanol B                            |                     |
| 534.209563 | 534.209472 | C <sub>27</sub> H <sub>34</sub> O <sub>11</sub> | 0.172  | [M + H] <sup>+</sup> , M <sup>+++</sup> | N.A    | 0.0110 | 0.0498 | N.A    | N.A    | N.A    | N.A    | N.A    | Arctiin                                | Lignan              |
| 538.089448 | 538.089343 | C <sub>30</sub> H <sub>18</sub> O <sub>10</sub> | 0.195  | M <sup>+</sup>                          | N.A    | N.A    | 0.0372 | N.A    | N.A    | N.A    | N.A    | N.A    | Sennidin A, Cupressuflavone            | Flavonoid           |
| 556.230299 | 556.230244 | C <sub>30</sub> H <sub>36</sub> O <sub>10</sub> | 0.098  | M <sup>+</sup>                          | 0.0057 | 0.0190 | 0.0337 | 0.0036 | N.A    | 0.0220 | N.A    | N.A    | Lariciresinol-sesquignan               | Lignan              |
| 559.144617 | 559.144632 | C <sub>27</sub> H <sub>26</sub> O <sub>13</sub> | -0.026 | [M + H] <sup>+</sup>                    | N.A    | N.A    | N.A    | 0.4405 | N.A    | N.A    | N.A    | N.A    | Piceatannol 4'-galloylglucoside        | Stilbenoid          |
| 578.141878 | 578.141689 | C <sub>30</sub> H <sub>26</sub> O <sub>12</sub> | 0.326  | [M + H] <sup>++</sup> , M <sup>++</sup> | N.A    | N.A    | 0.0049 | N.A    | N.A    | N.A    | N.A    | N.A    | Procyanidin dimer B1                   | Tannins             |
| 578.163007 | 578.163024 | C <sub>27</sub> H <sub>30</sub> O <sub>14</sub> | -0.029 | [M + H] <sup>+</sup> , M <sup>+++</sup> | N.A    | N.A    | N.A    | 4.3147 | N.A    | N.A    | N.A    | 1.2733 | Isorhoifolin, Vitexin 2''-O-rhamnoside | Flavonoid glucoside |

\*Major ion
